# Supplementary material
Source: publisher figshare collection journal article supplement (https://acs.figshare.com/ndownloader/files/13481903)
Supplement: Supplementary file 1 [file 13481903]

**Unified Strategy for 1,5,9- and 1,5,7-Triols via Configuration-Encoded  
1,5-Polyol Synthesis: Preparation and Coupling of  
C15–C25 and C26–C40 Fragments of Tetrafibricin**

Ryan M. Friedrich, Jay Q. Bell, Alfredo Garcia, Zican Shen, Gregory K. Friestad\*

*Department of Chemistry, University of Iowa, Iowa City, Iowa 52242 USA*

email: gregory-friestad@uiowa.edu

**Supporting Information**

**File C**

**Contents:**

**File A**

<sup>1</sup>H and <sup>13</sup>C NMR Spectra for New Compounds **43, 44, 4–6, 2, 9–15, 46, 37, 38, 16** S2–S42

**File B**

<sup>1</sup>H and <sup>13</sup>C NMR Spectra for New Compounds **17b, 18, 39, 19–24, 26–28, 32, 42, 33–35** S44–S82

**File C**

2D NMR Spectra for New Compounds **20, 28, and 35** S84–S107

Diastereomer Ratios and Configuration Assignments of **9, 26a, 28, 26b, 33, and 34** S108–S119

## 2D NMR Spectra

Arrows = DQF  $^1\text{H}$ - $^1\text{H}$  COSY

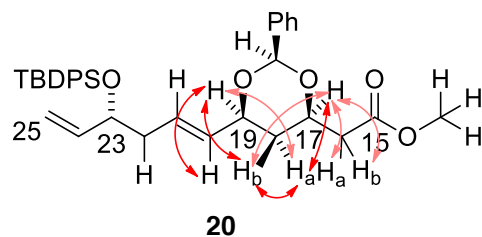

Figure S1: Diagnostic 2D NMR correlations of benzylidene acetal portion of C15–C25 fragment of tetrafibricin

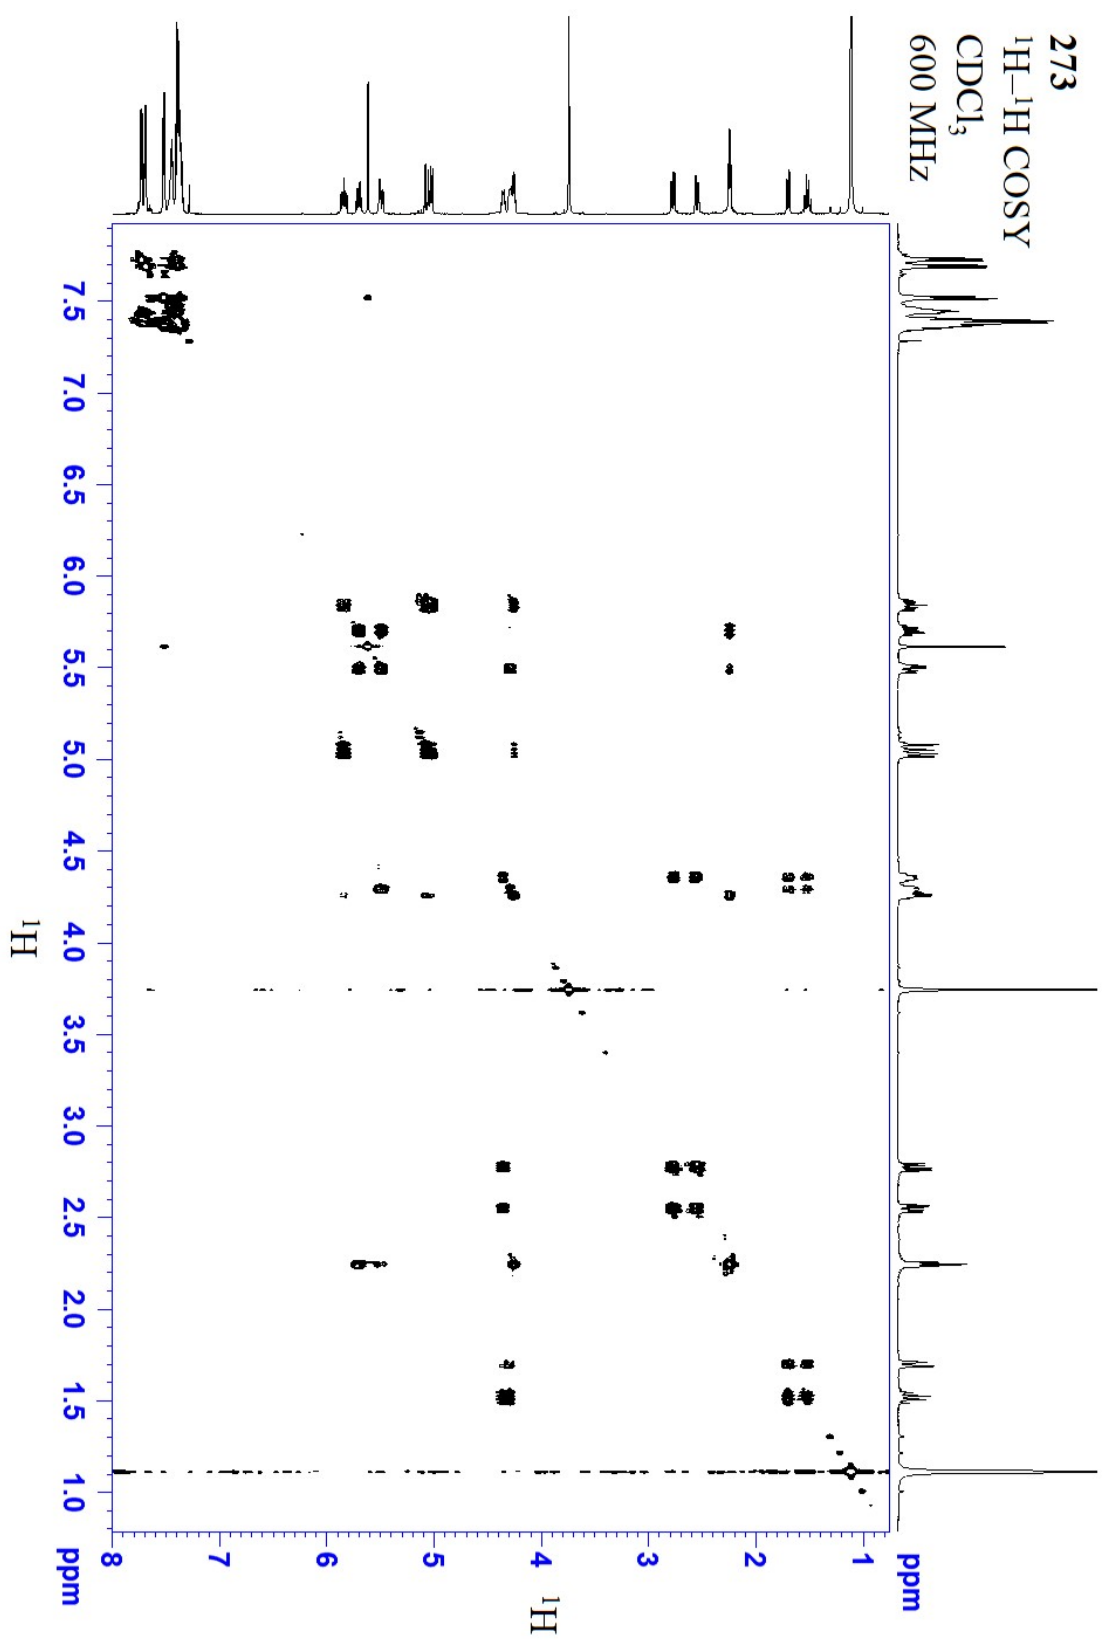

DQF  $^1\text{H}$ - $^1\text{H}$  COSY spectrum of **20**

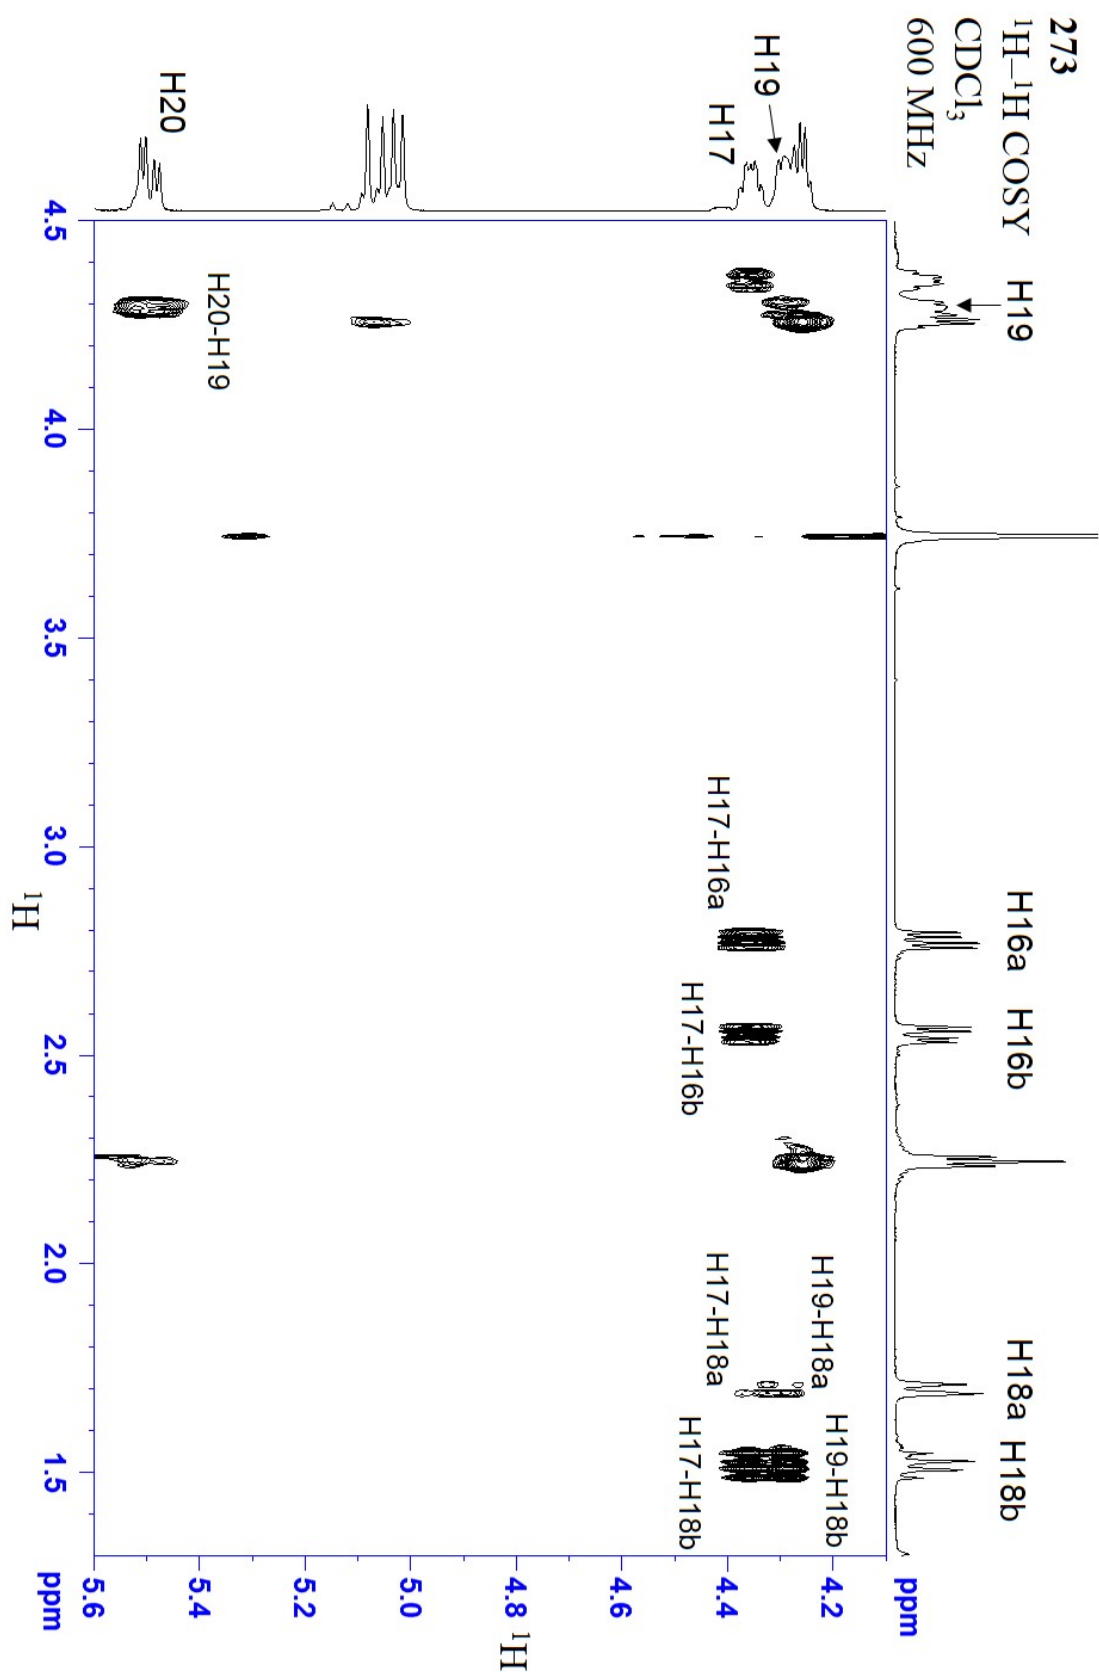

DQF  $^1\text{H}$ - $^1\text{H}$  COSY spectrum of **20**

Arrows = DQF  $^1\text{H}$ - $^1\text{H}$  COSY

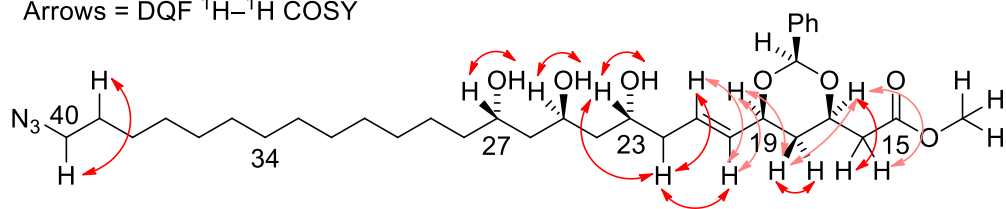

Red Bonds = HSQC

Arrows = HMBC

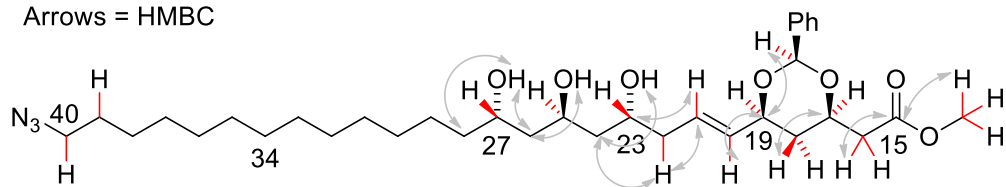

Arrows = TOCSY

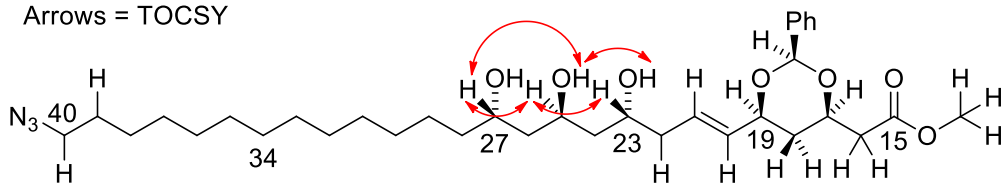

Figure S2: Diagnostic 2D NMR correlations of **28** (model C15–C40 fragment of tetrafibricin)

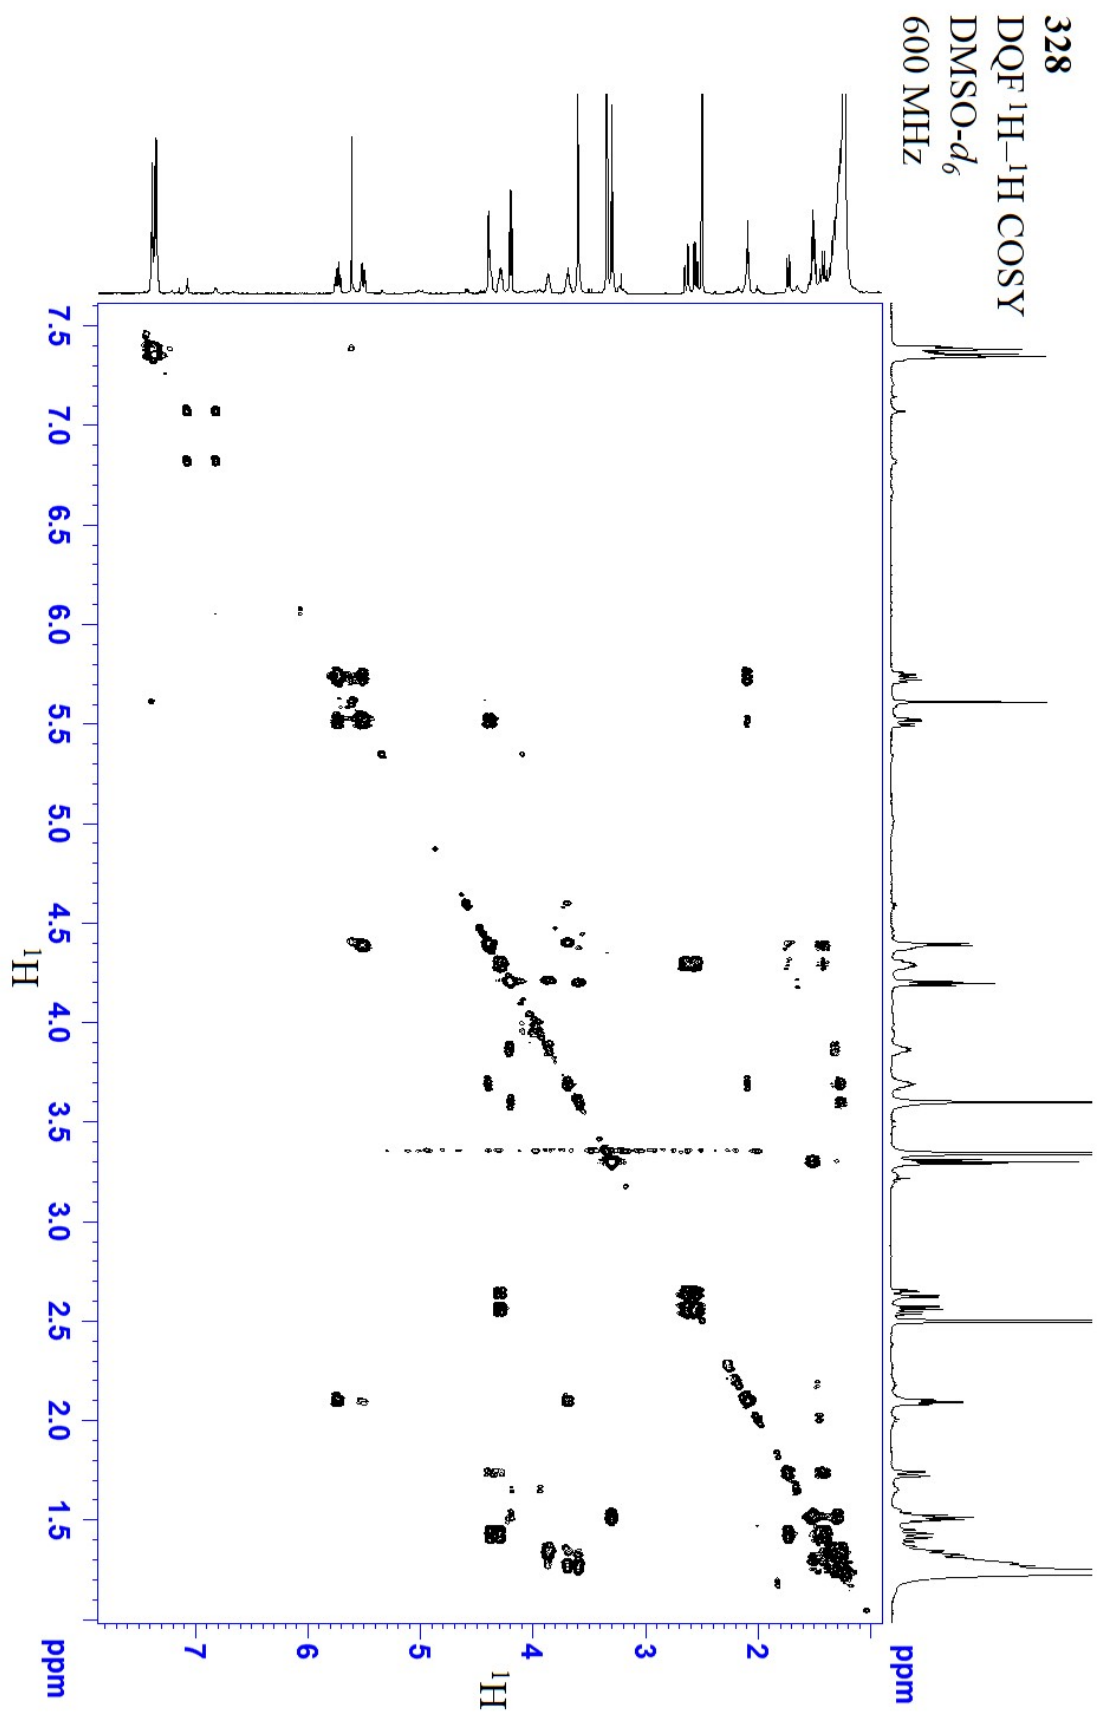

DQF  $^1\text{H}$ - $^1\text{H}$  COSY spectrum of **28**

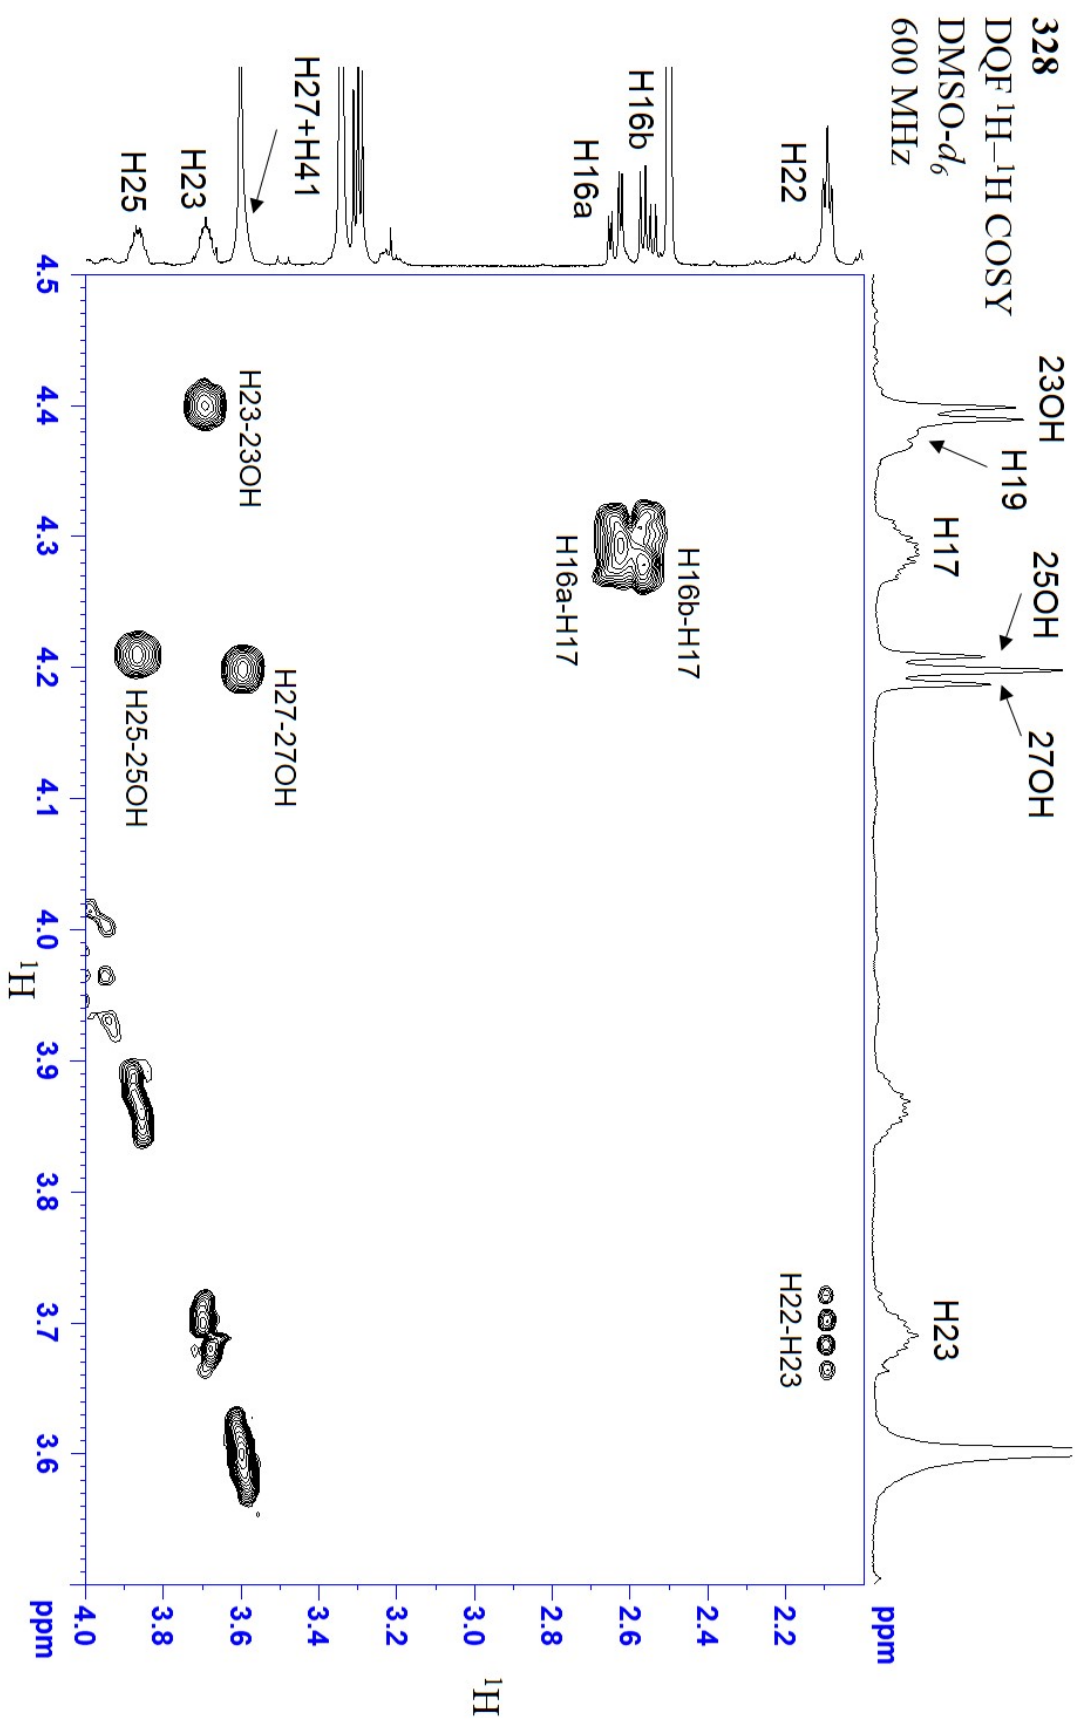

DQF  $^1\text{H}$ - $^1\text{H}$  COSY spectrum of **28**

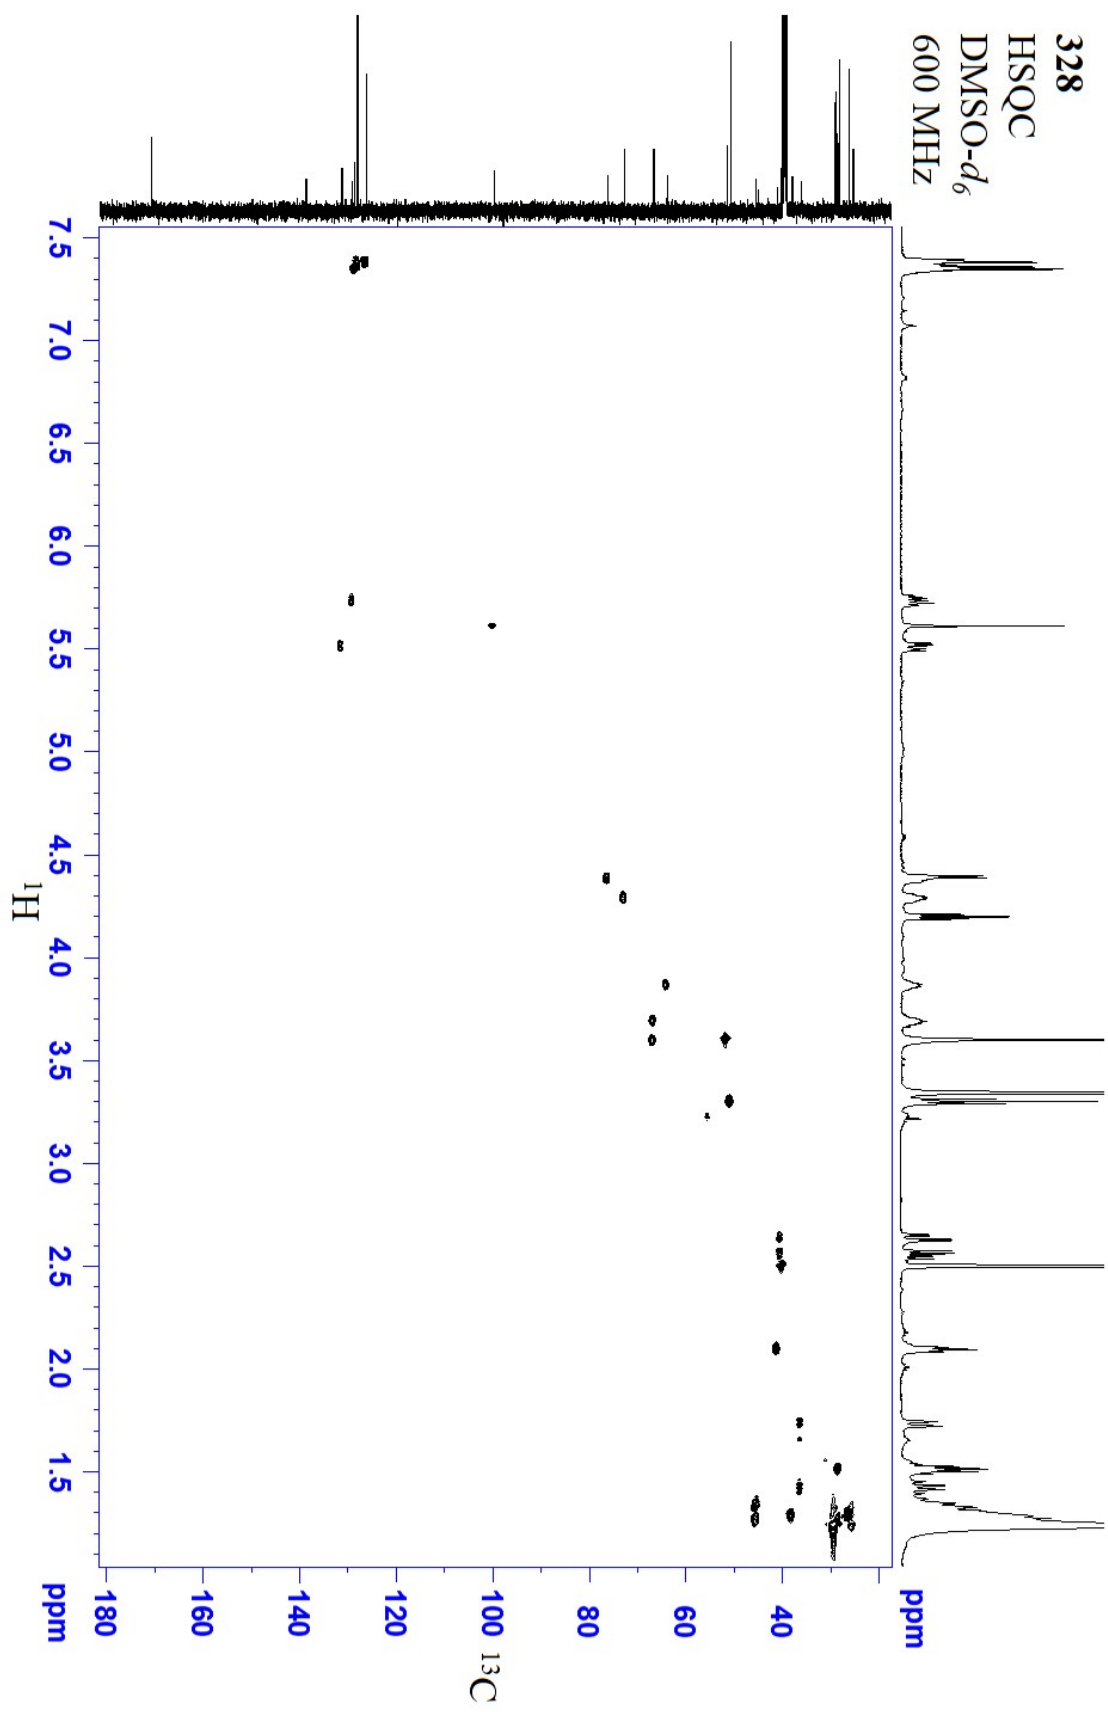

HSQC spectrum of **28**



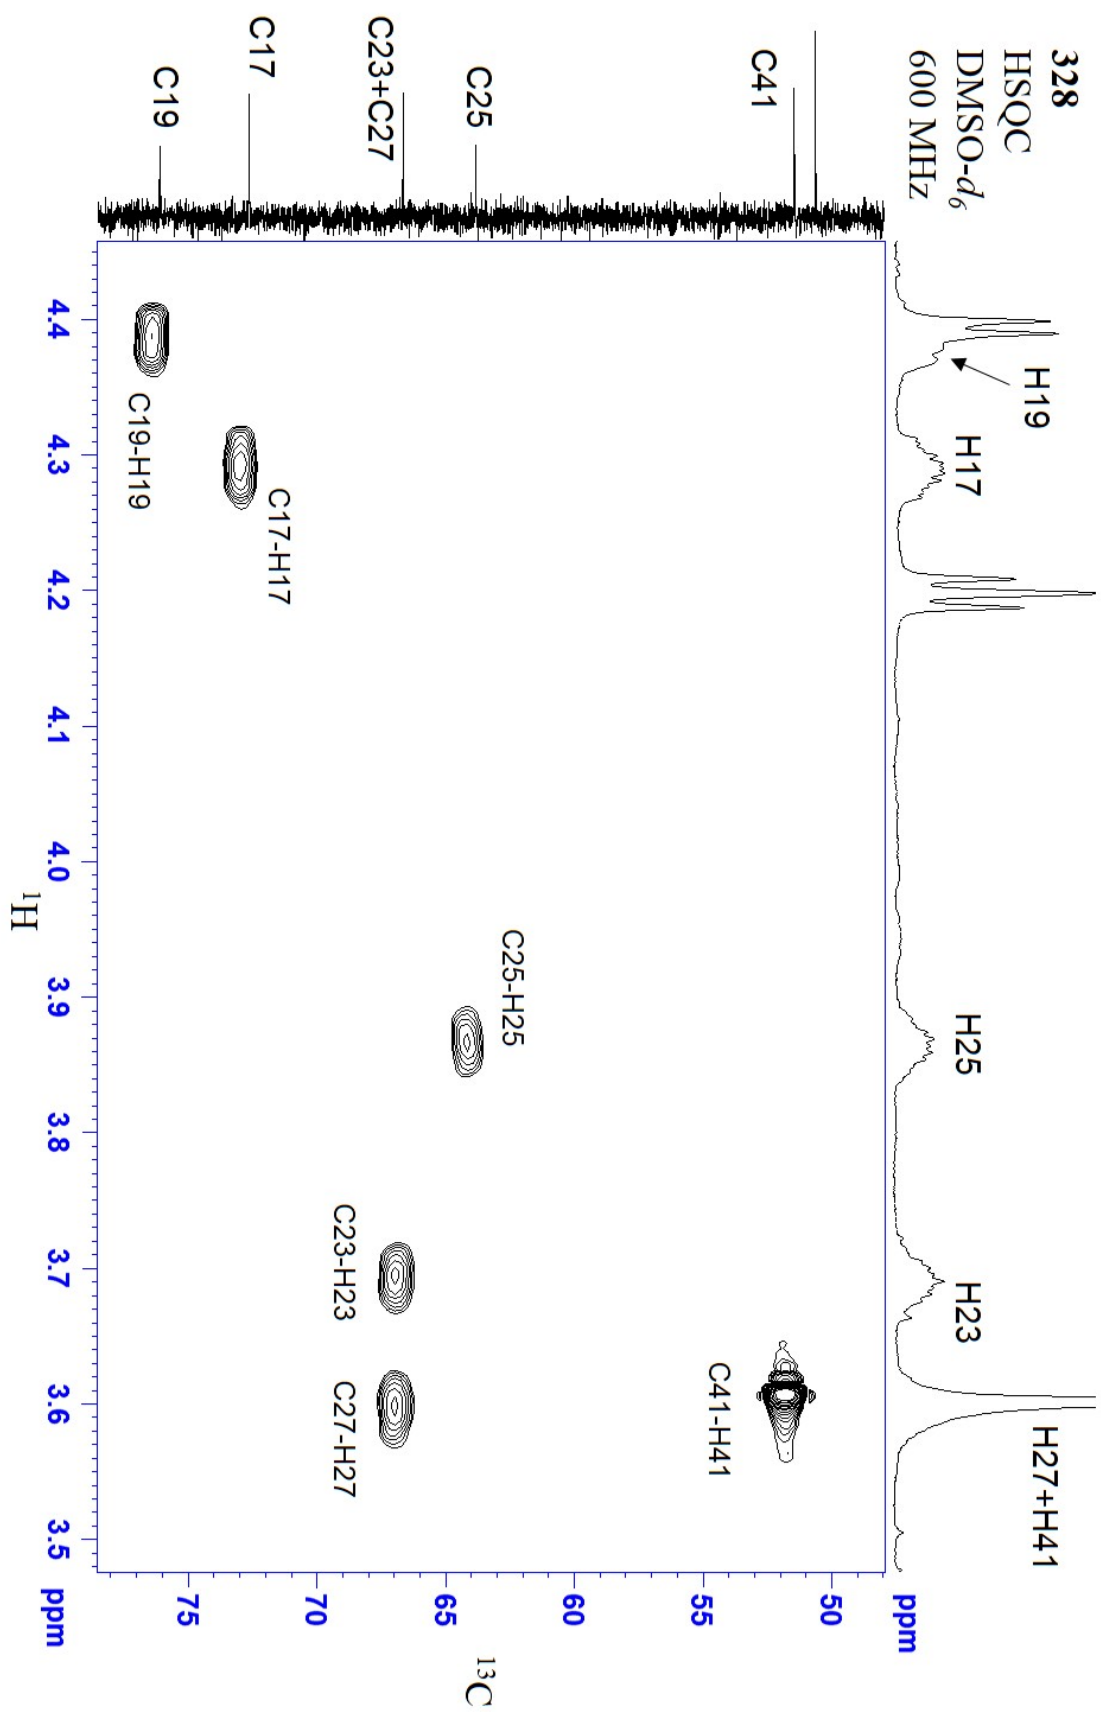

HSQC spectrum of **28**

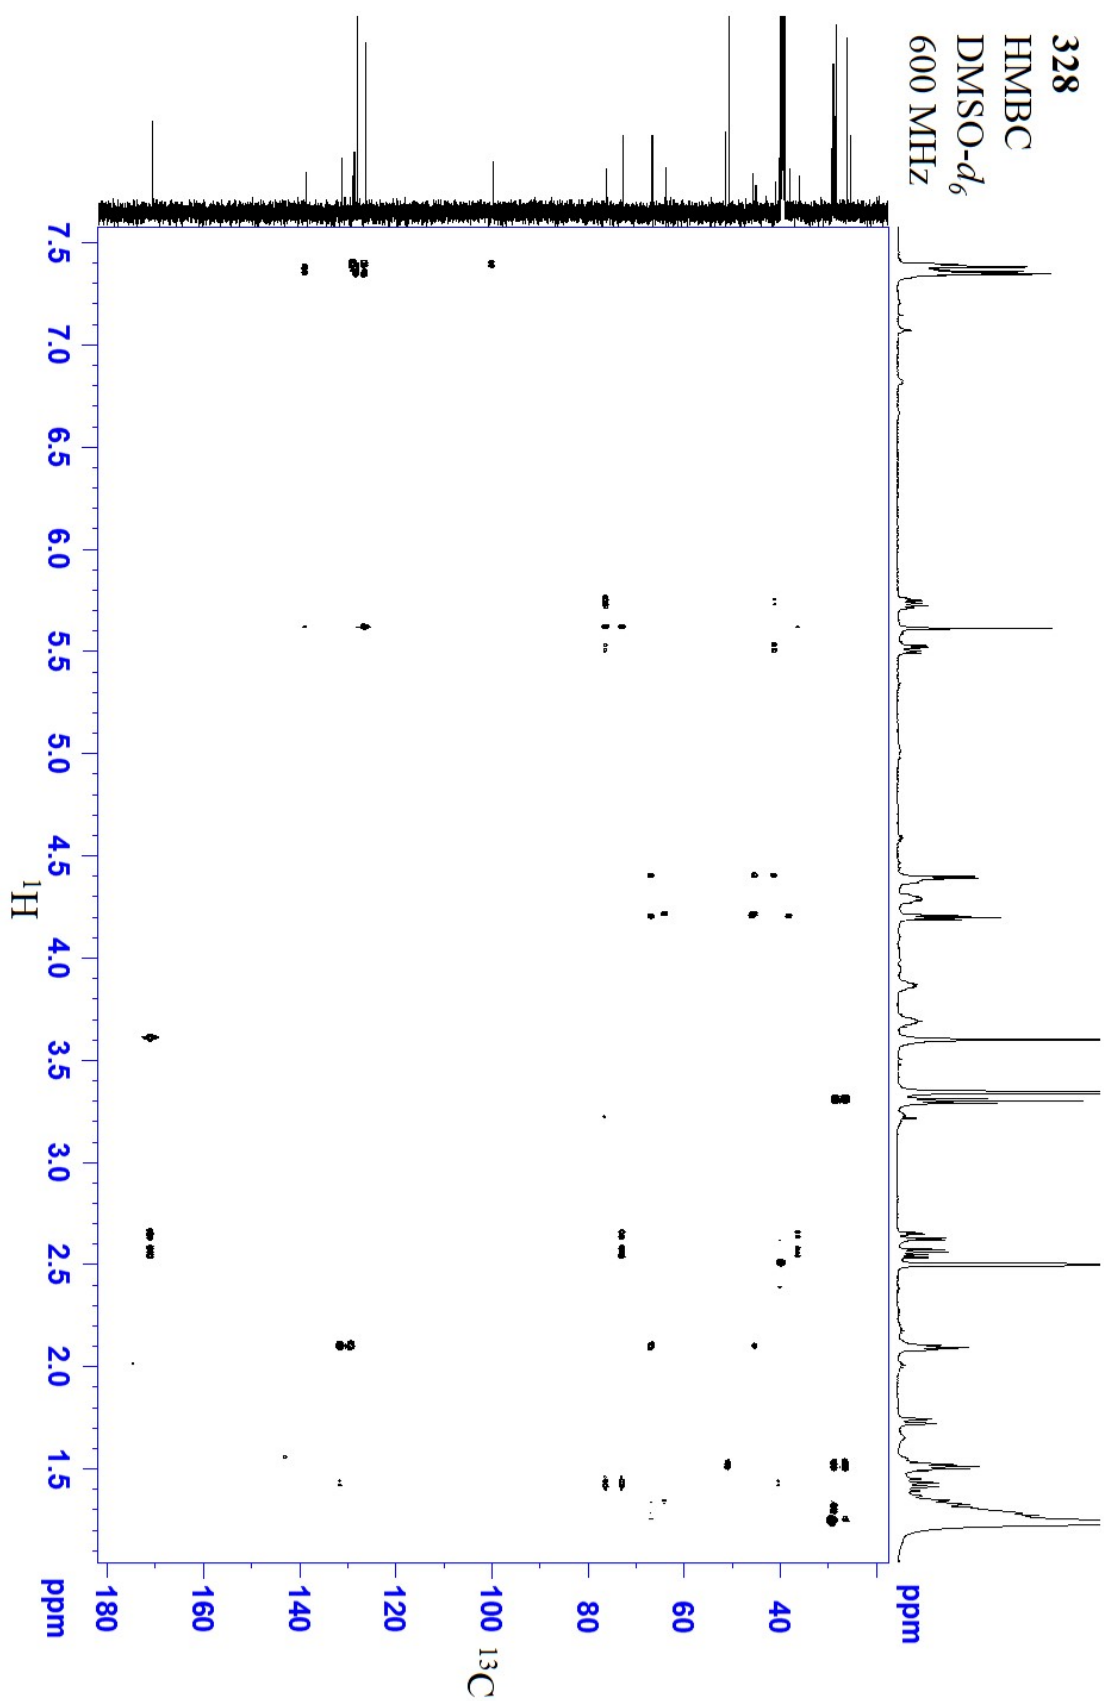

HMBC spectrum of **28**

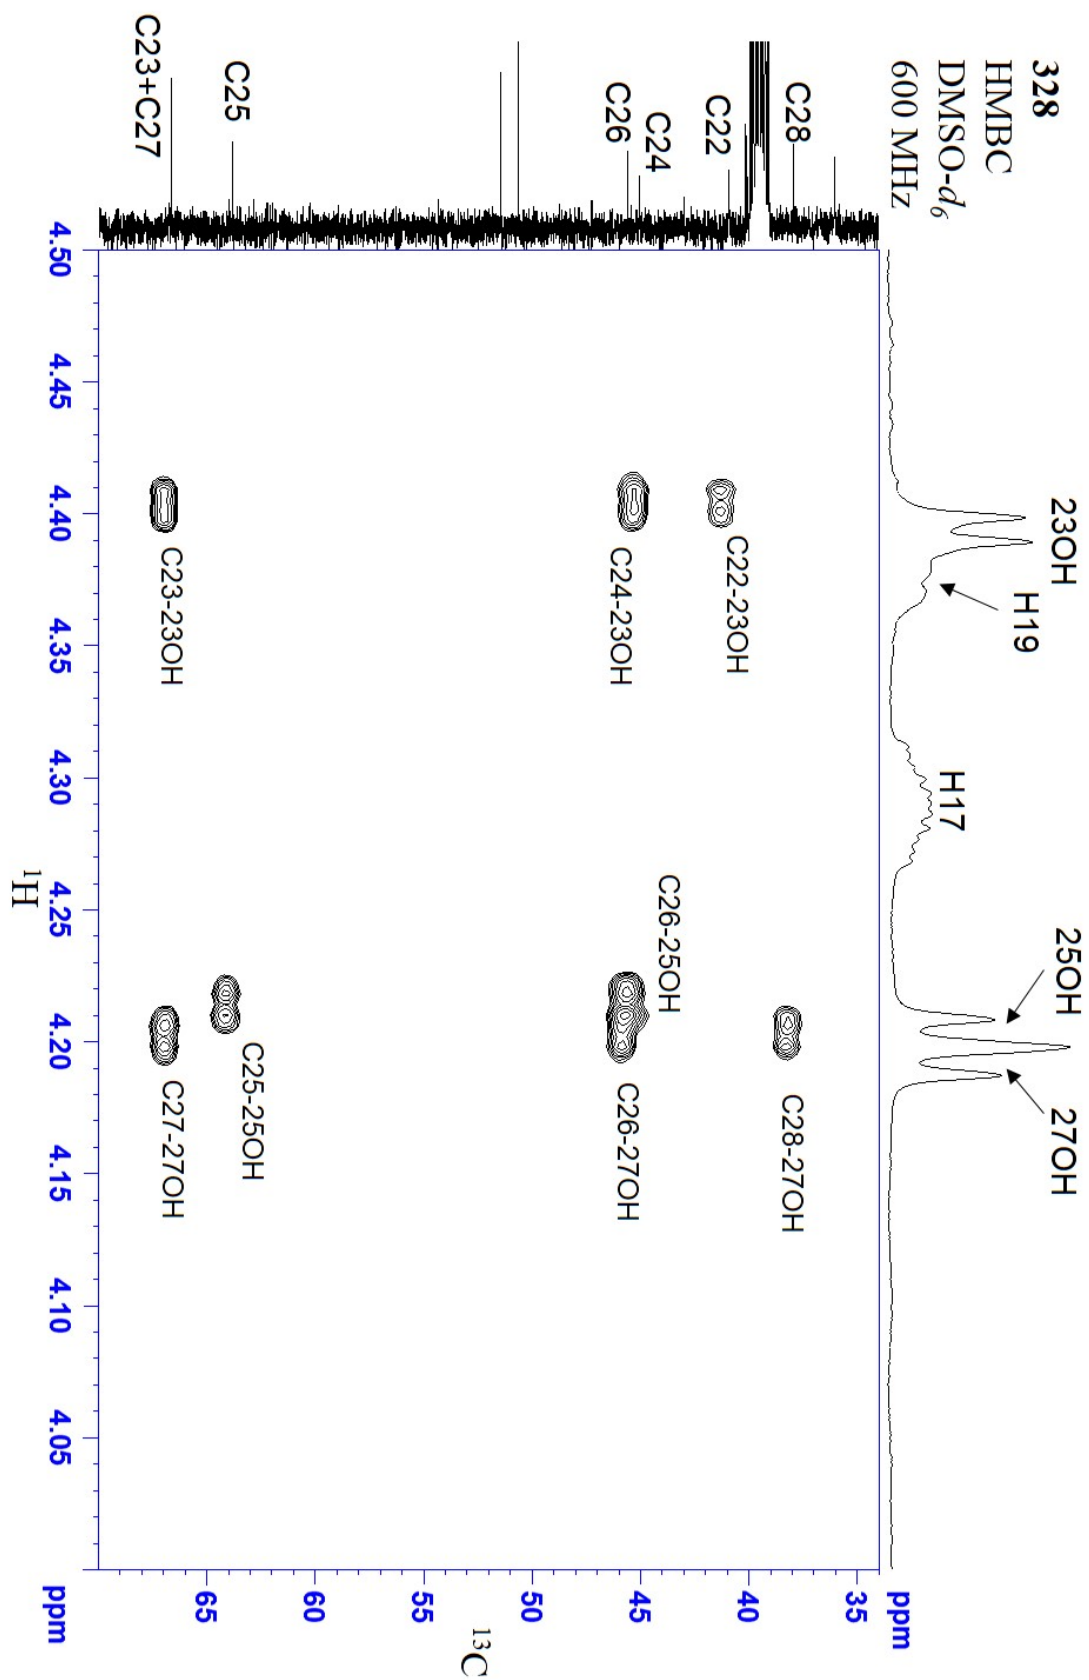

HMBC spectrum of **28**

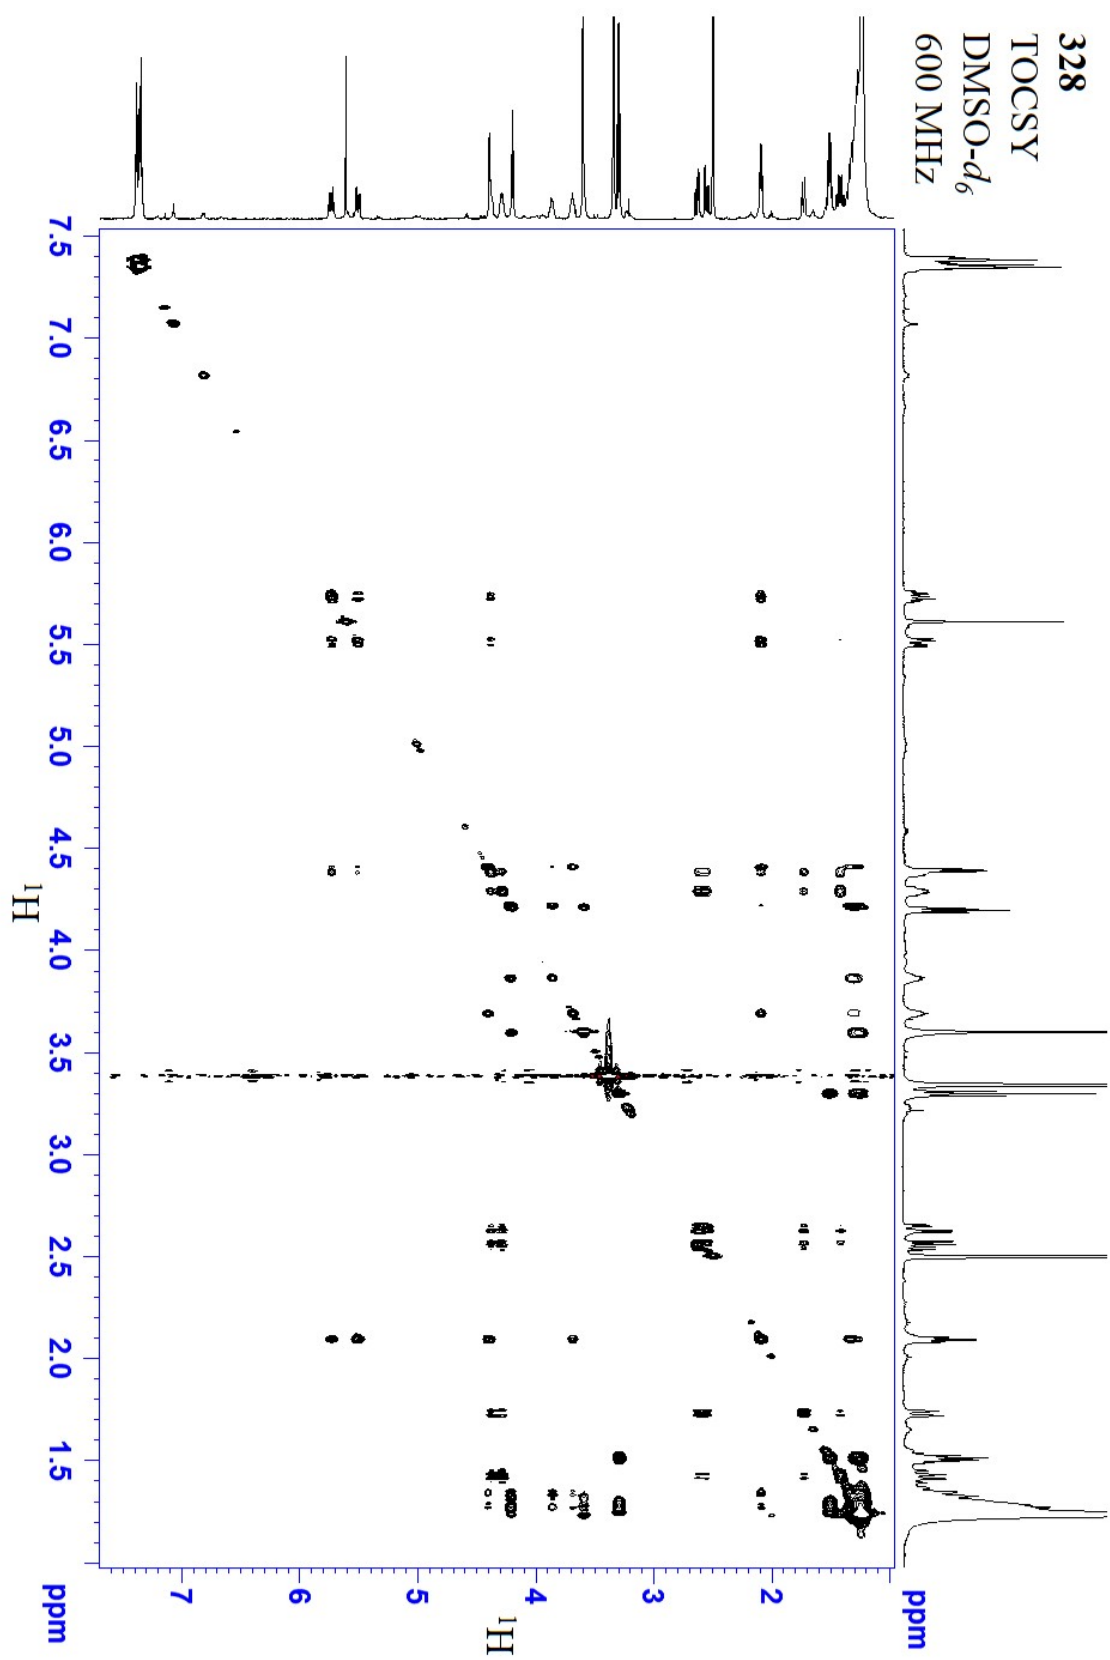

TOCSY spectrum of **28**

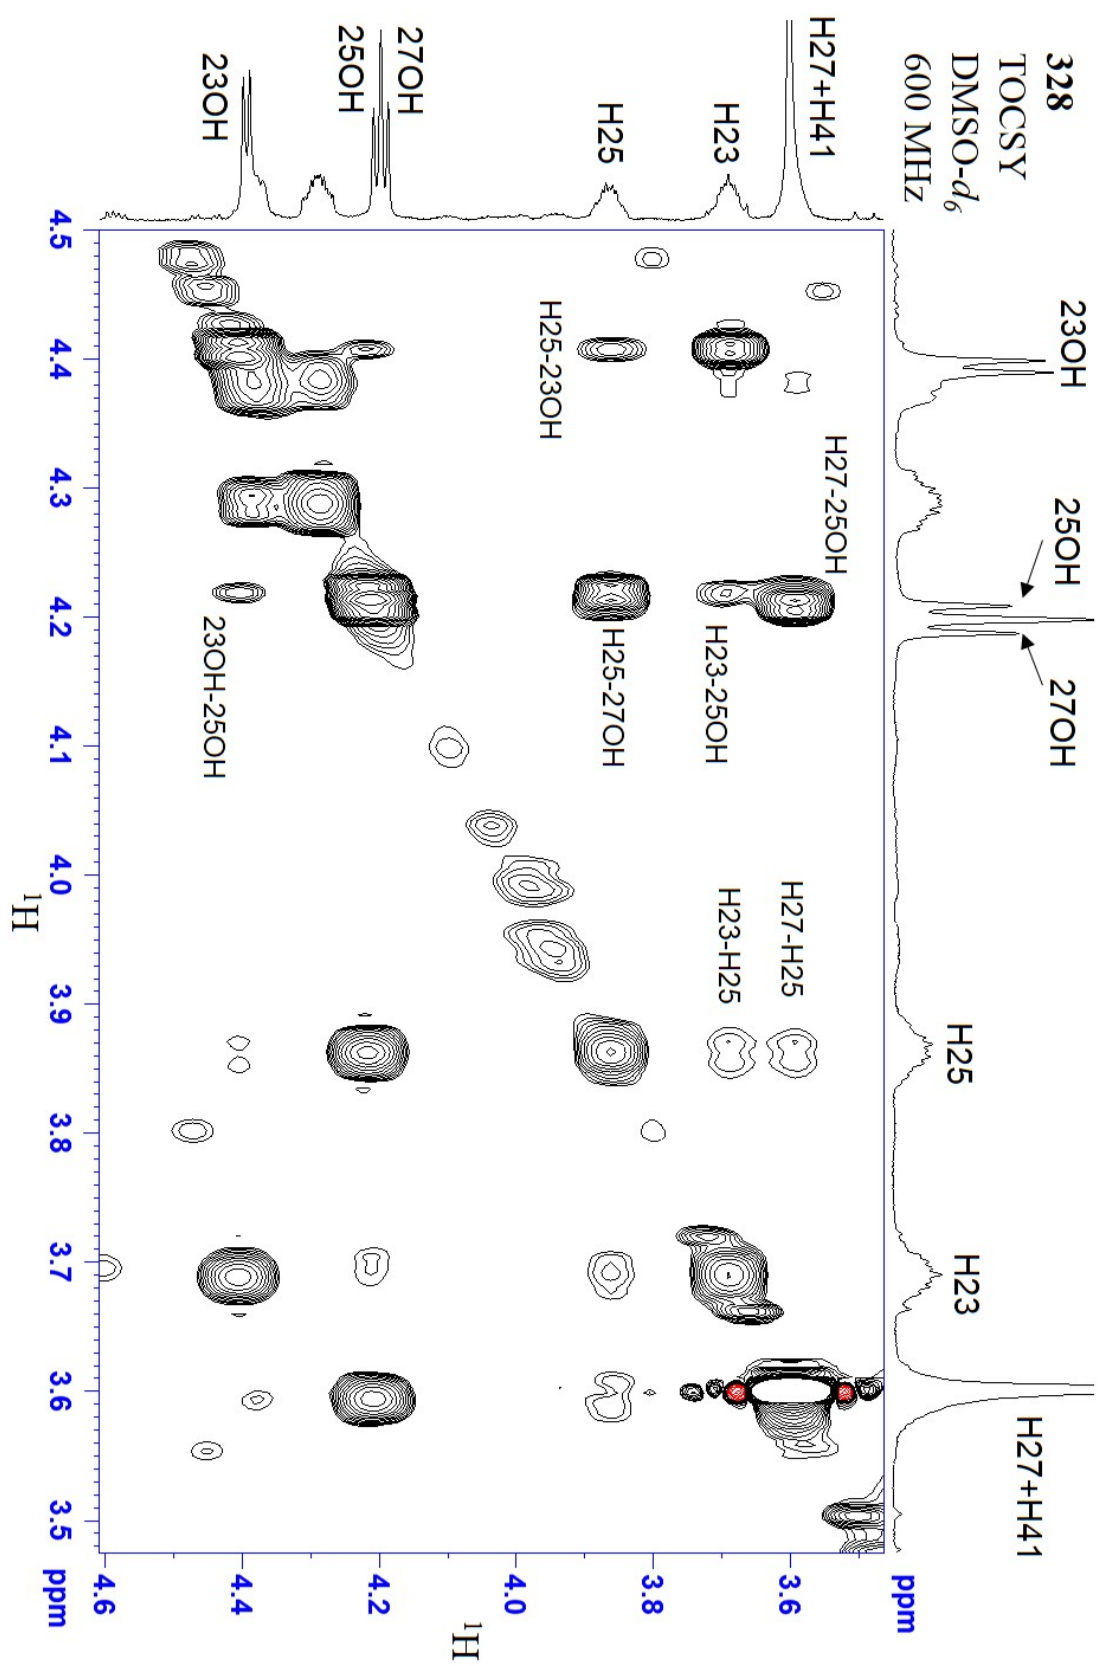

TOCSY spectrum of **28**

Arrows = DQF  $^1\text{H}$ - $^1\text{H}$  COSY

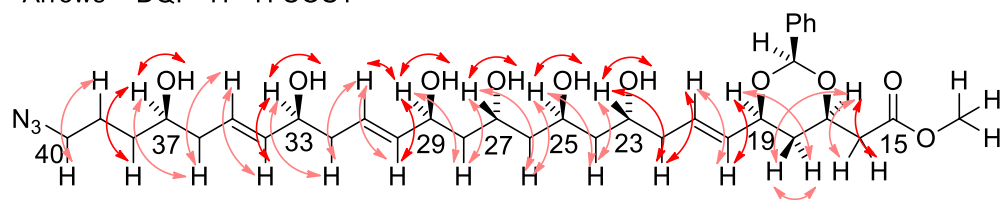

Red Bonds = HSQC

Arrows = HMBC

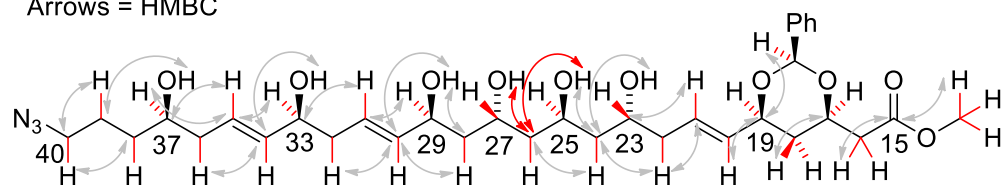

Arrows = TOCSY

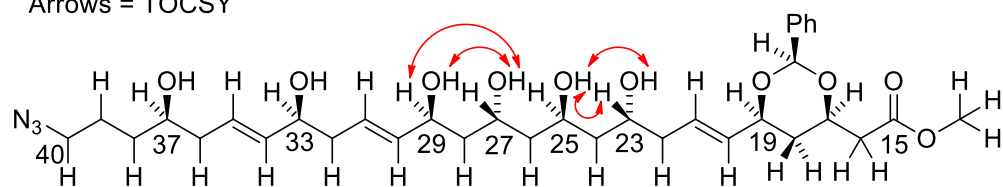

Figure S3: Diagnostic 2D NMR correlations of **35** (C15-C40 fragment of tetrafibricin)

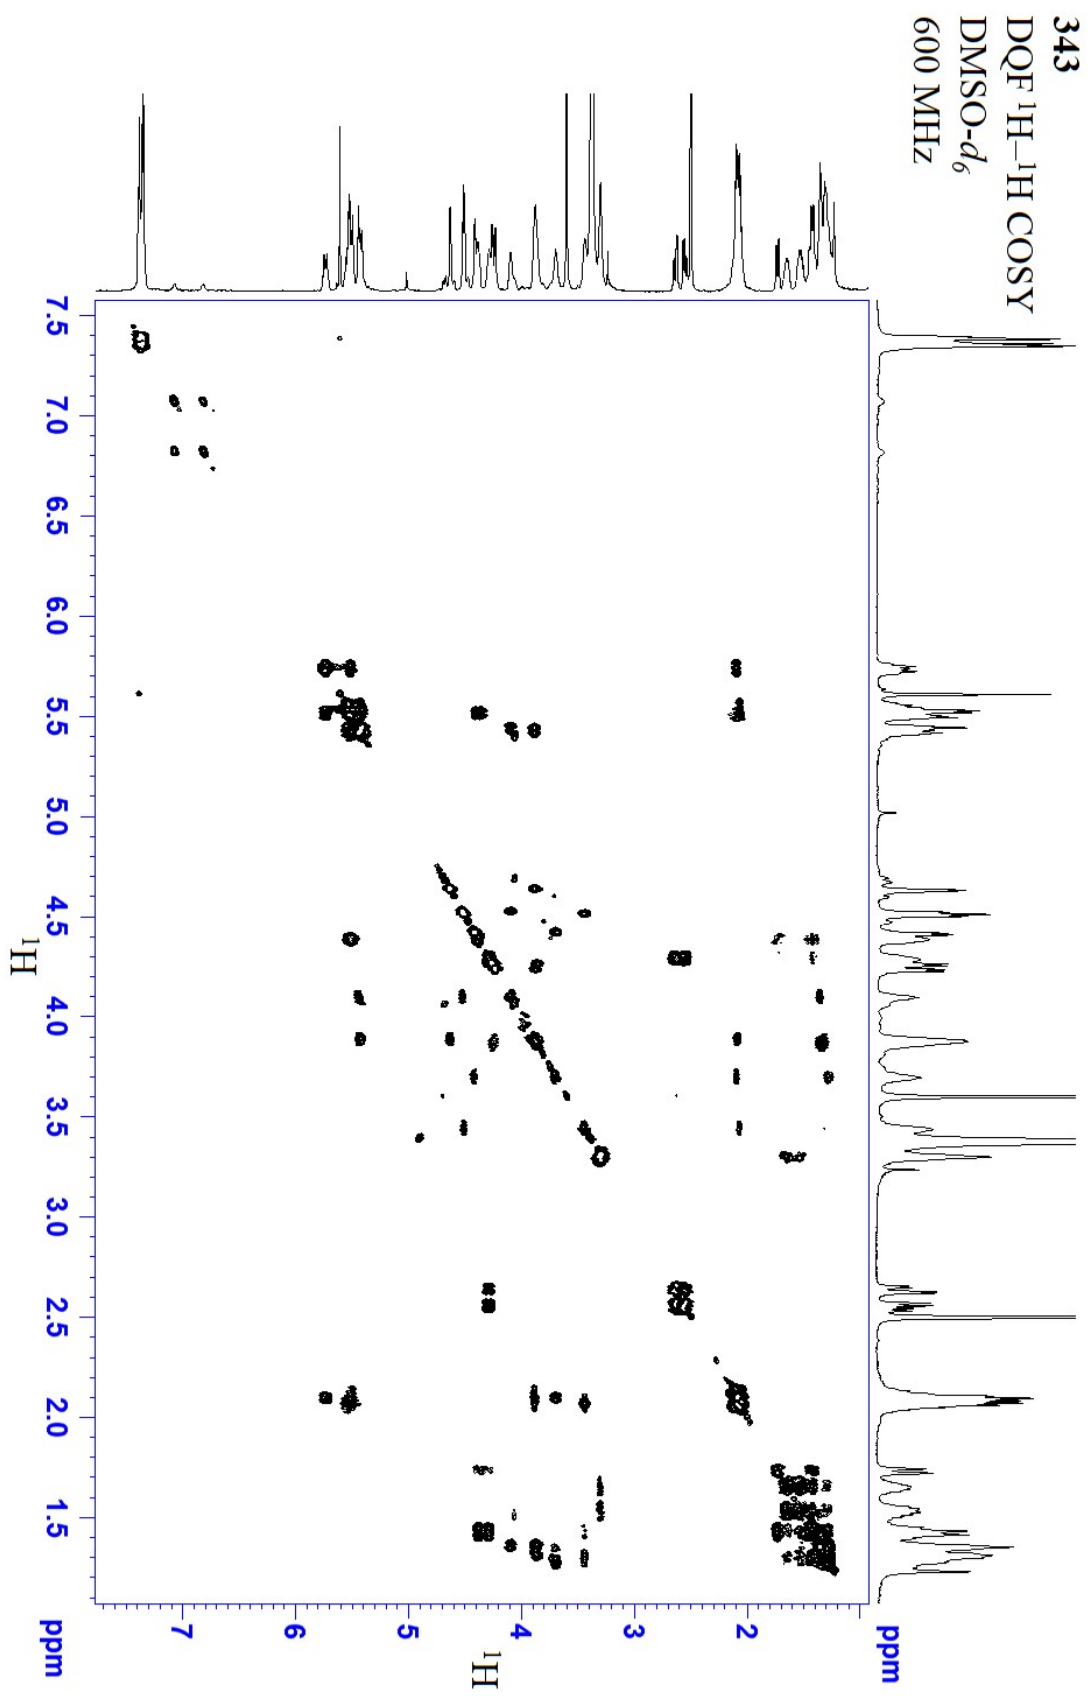

DQF  $^1\text{H}$ - $^1\text{H}$  COSY spectrum of **35**

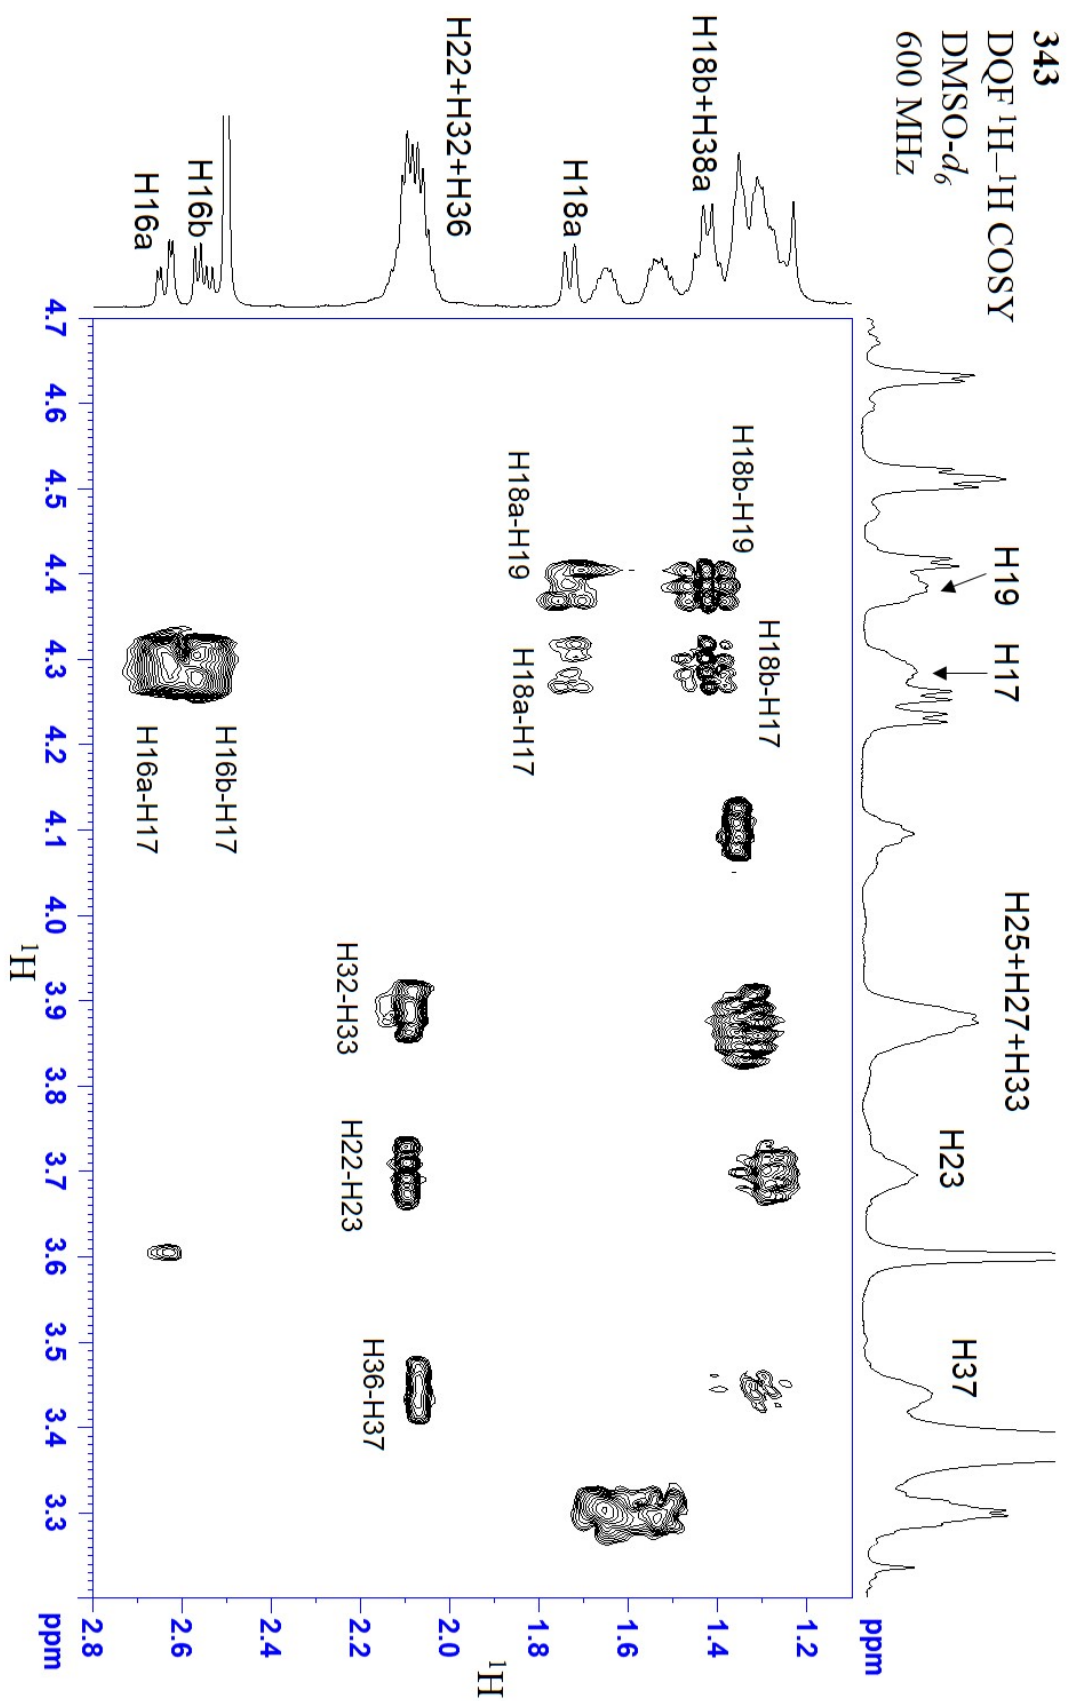DQF  $^1\text{H}$ - $^1\text{H}$  COSY spectrum of **35**



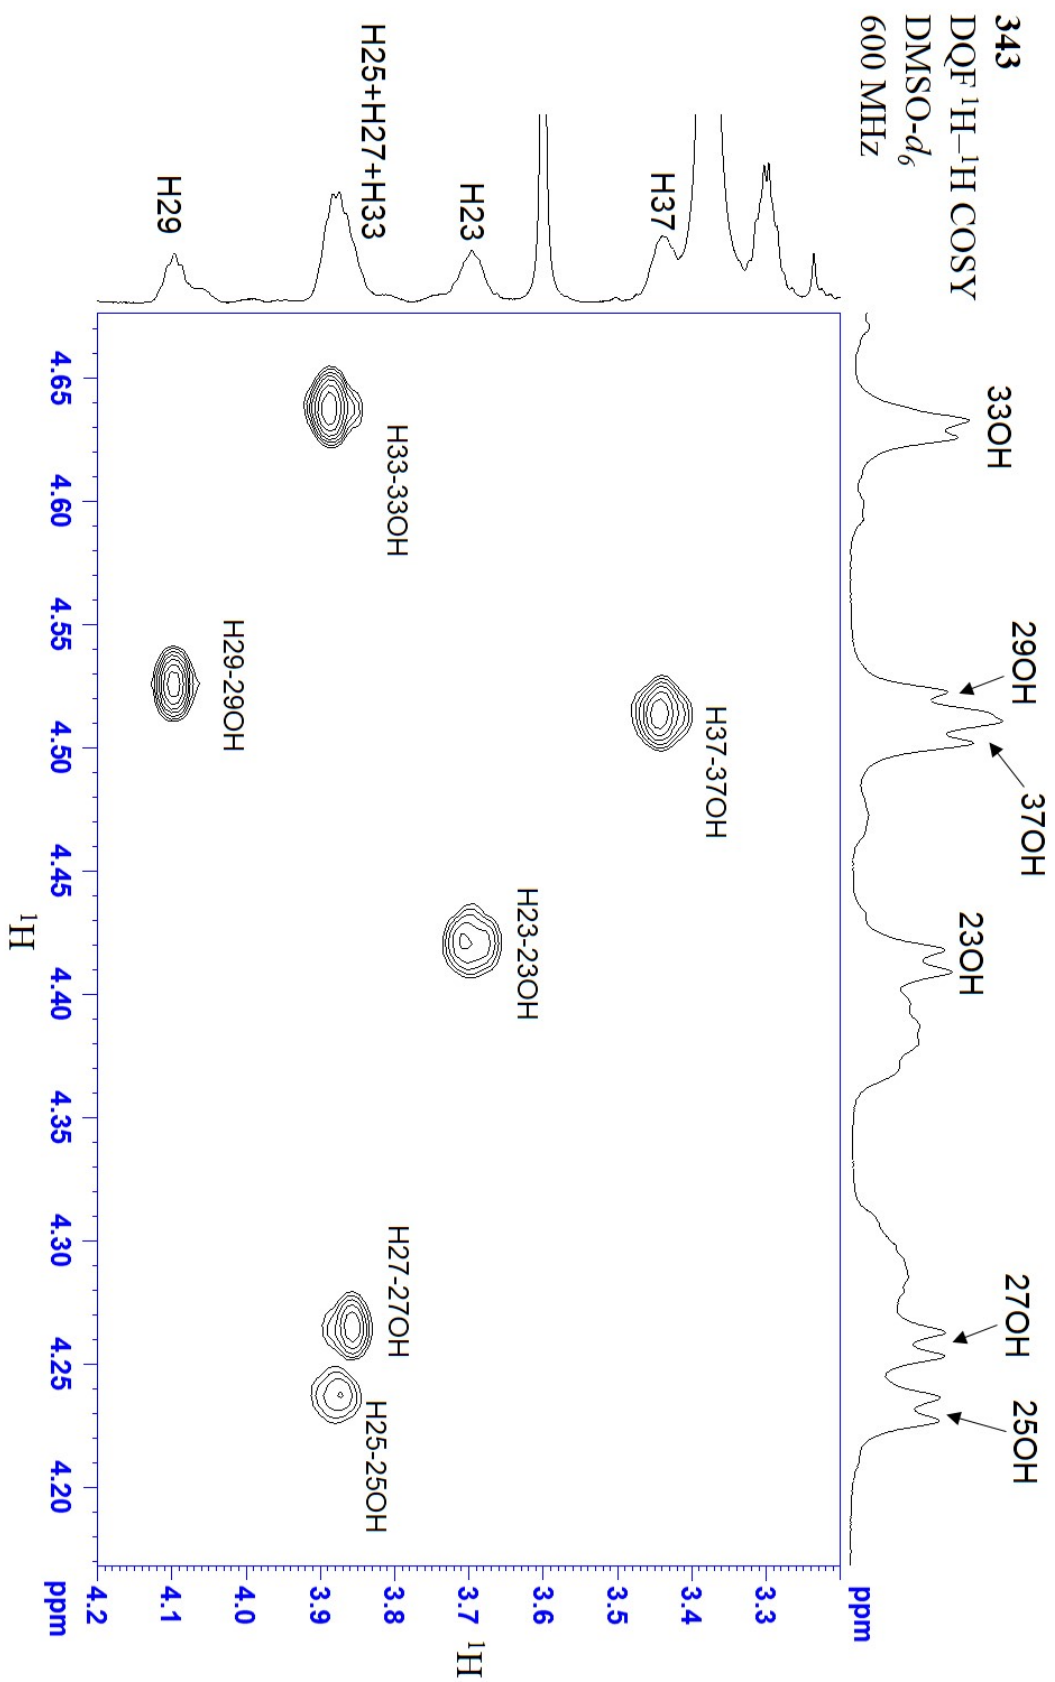

DQF  $^1\text{H}$ - $^1\text{H}$  COSY spectrum of **35**

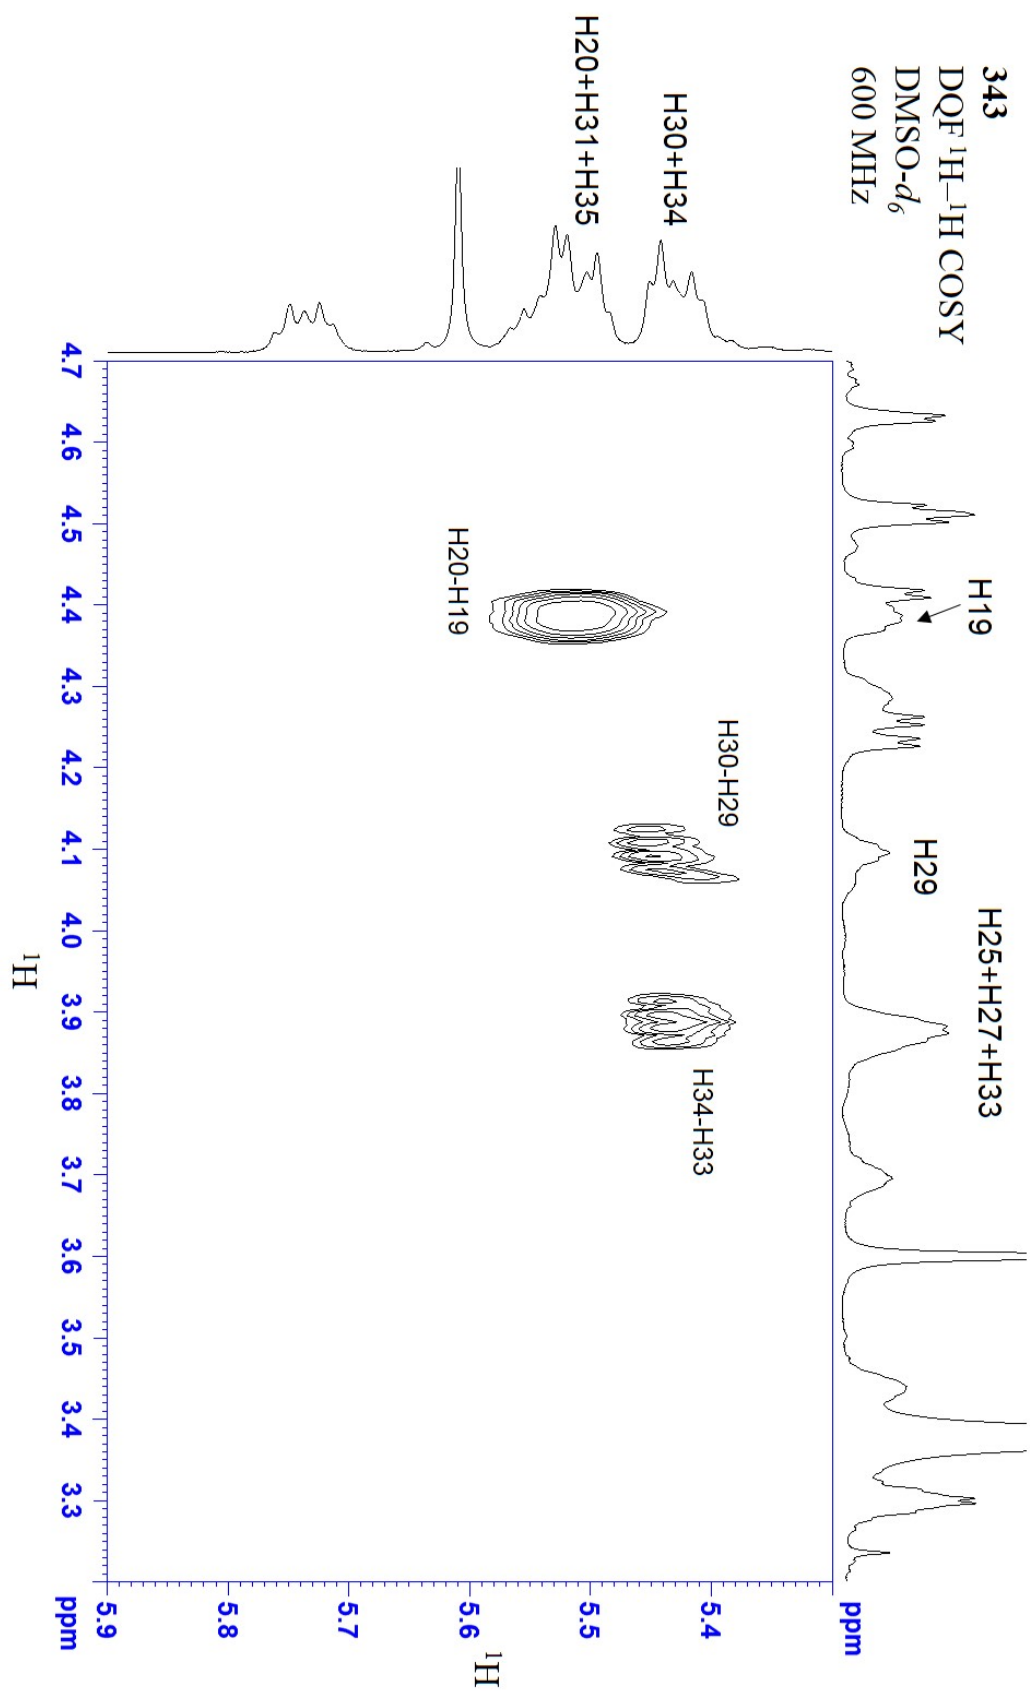

DQF  $^1\text{H}$ - $^1\text{H}$  COSY spectrum of **35**

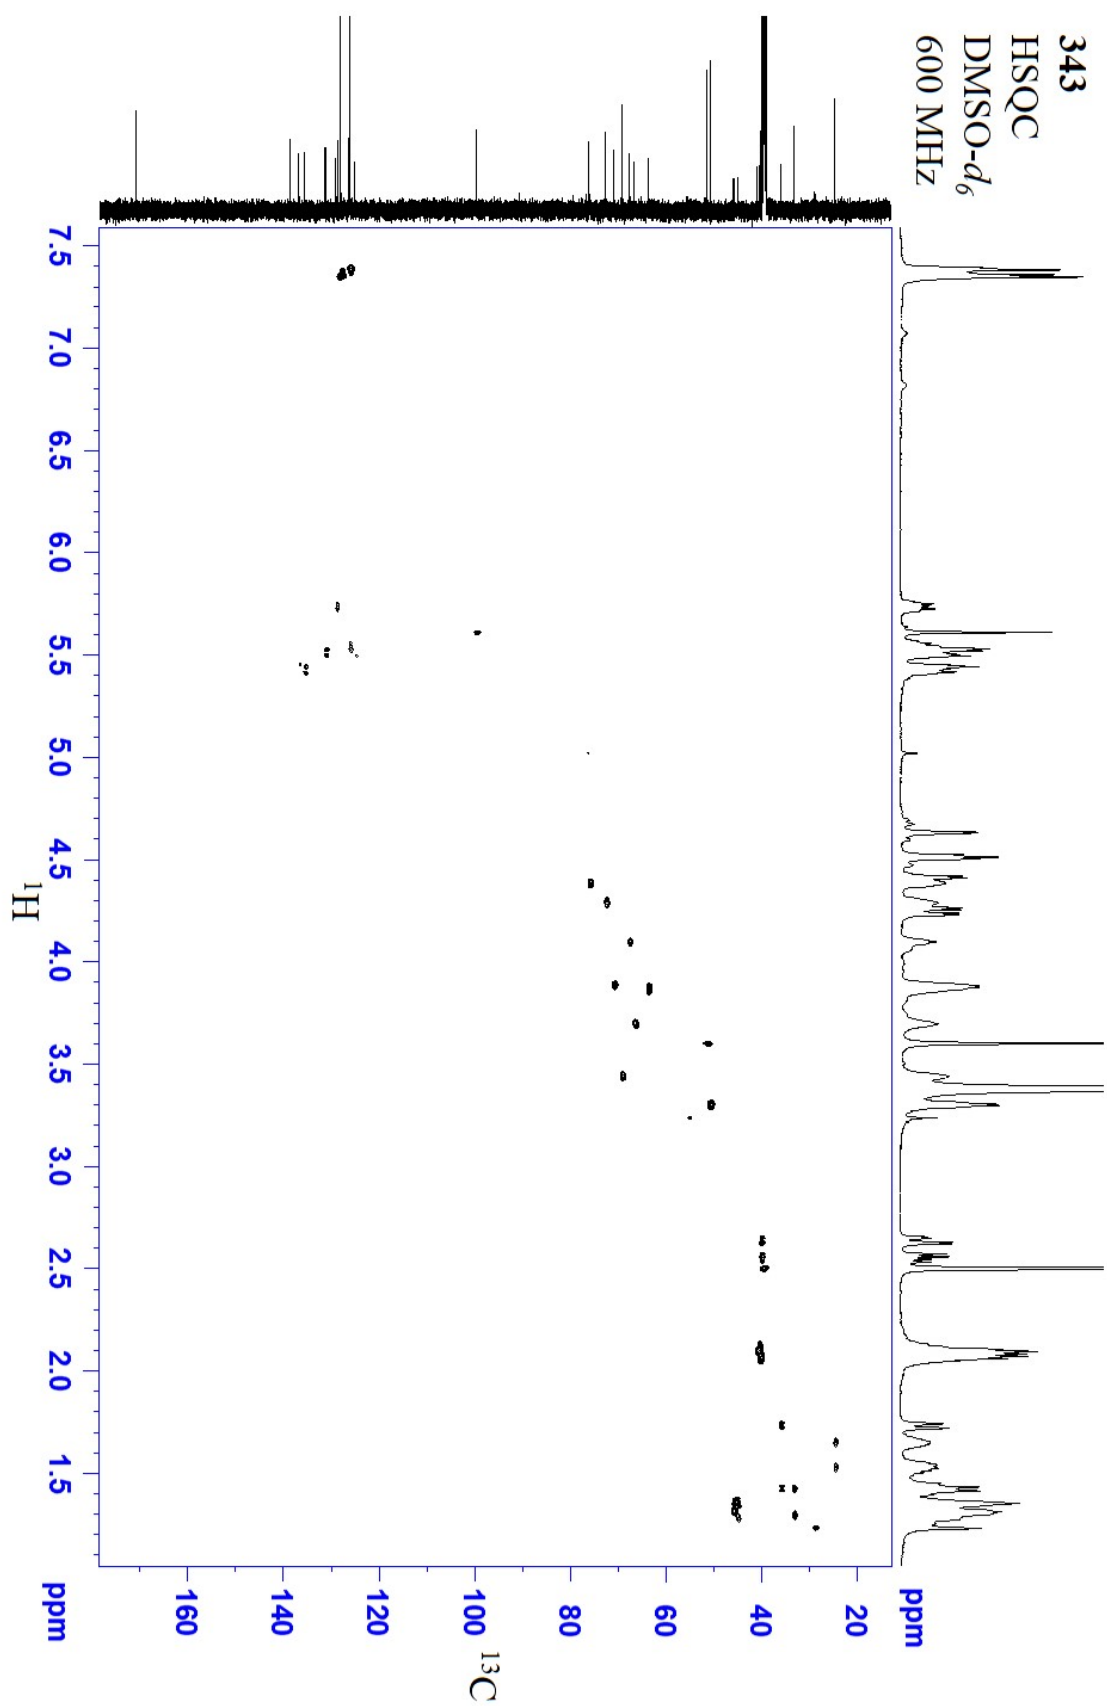

HSQC spectrum of **35**

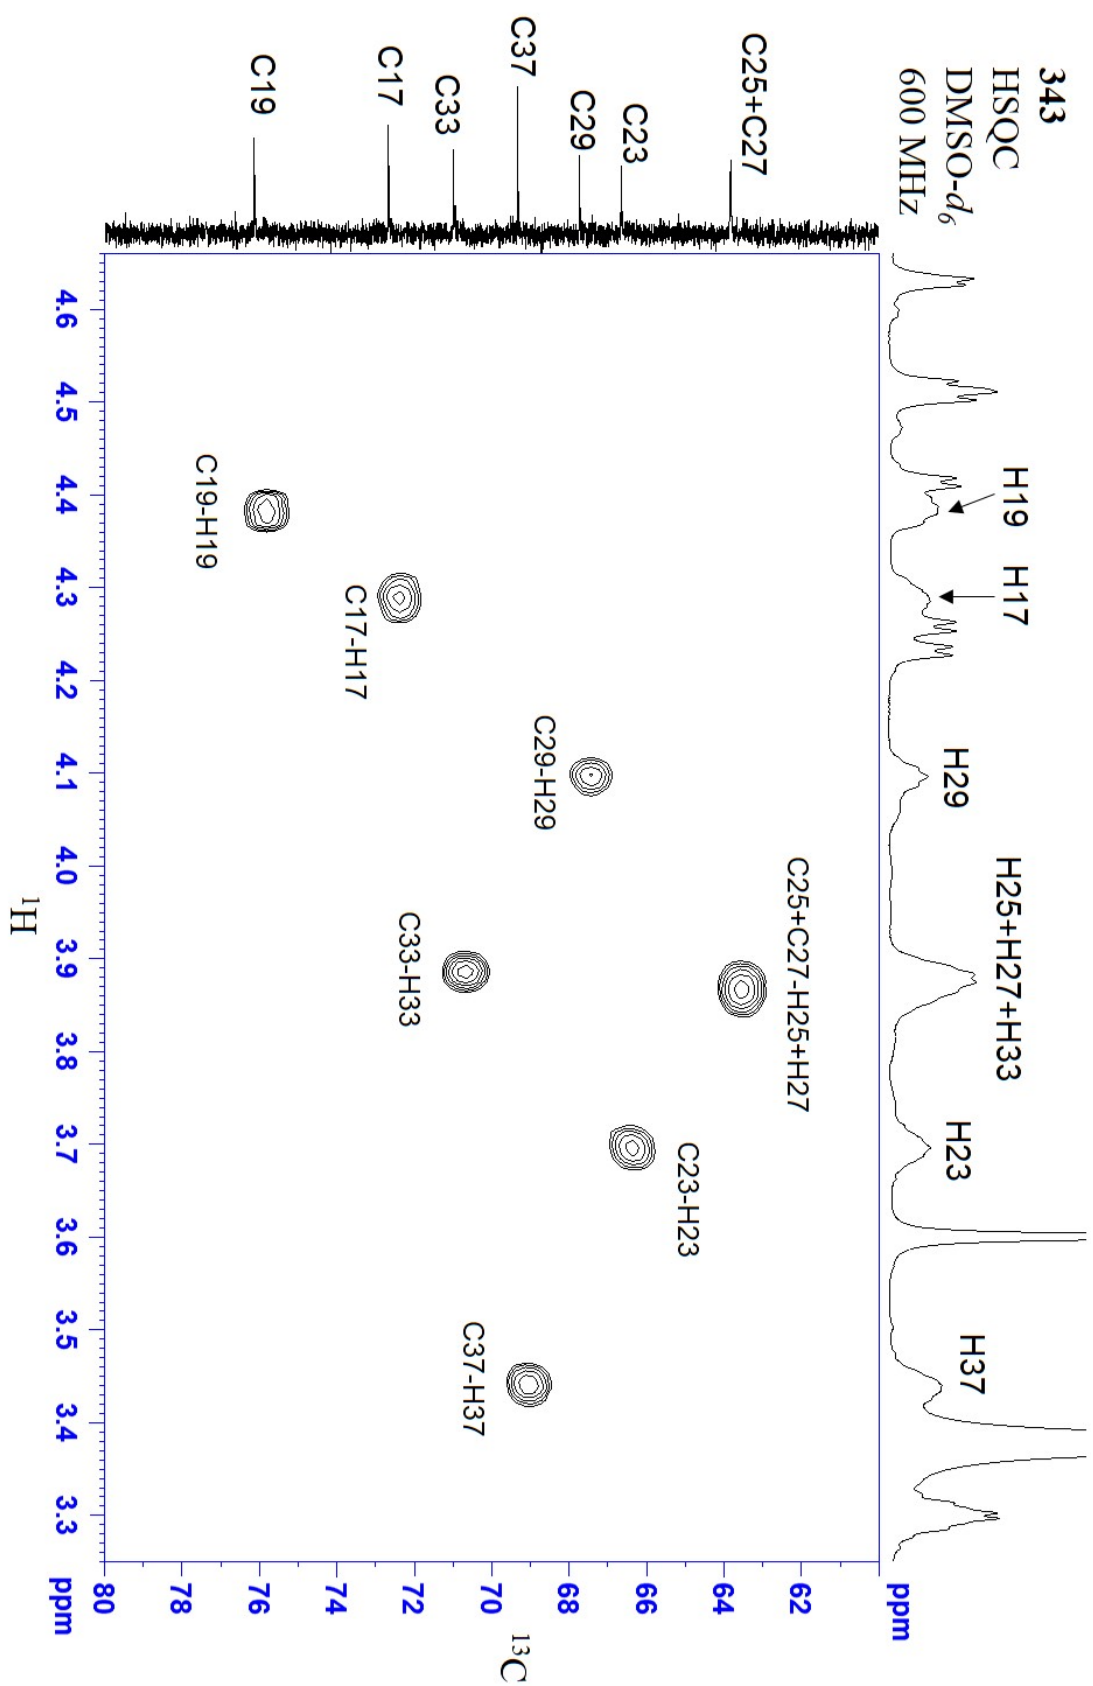

HSQC spectrum of **35**

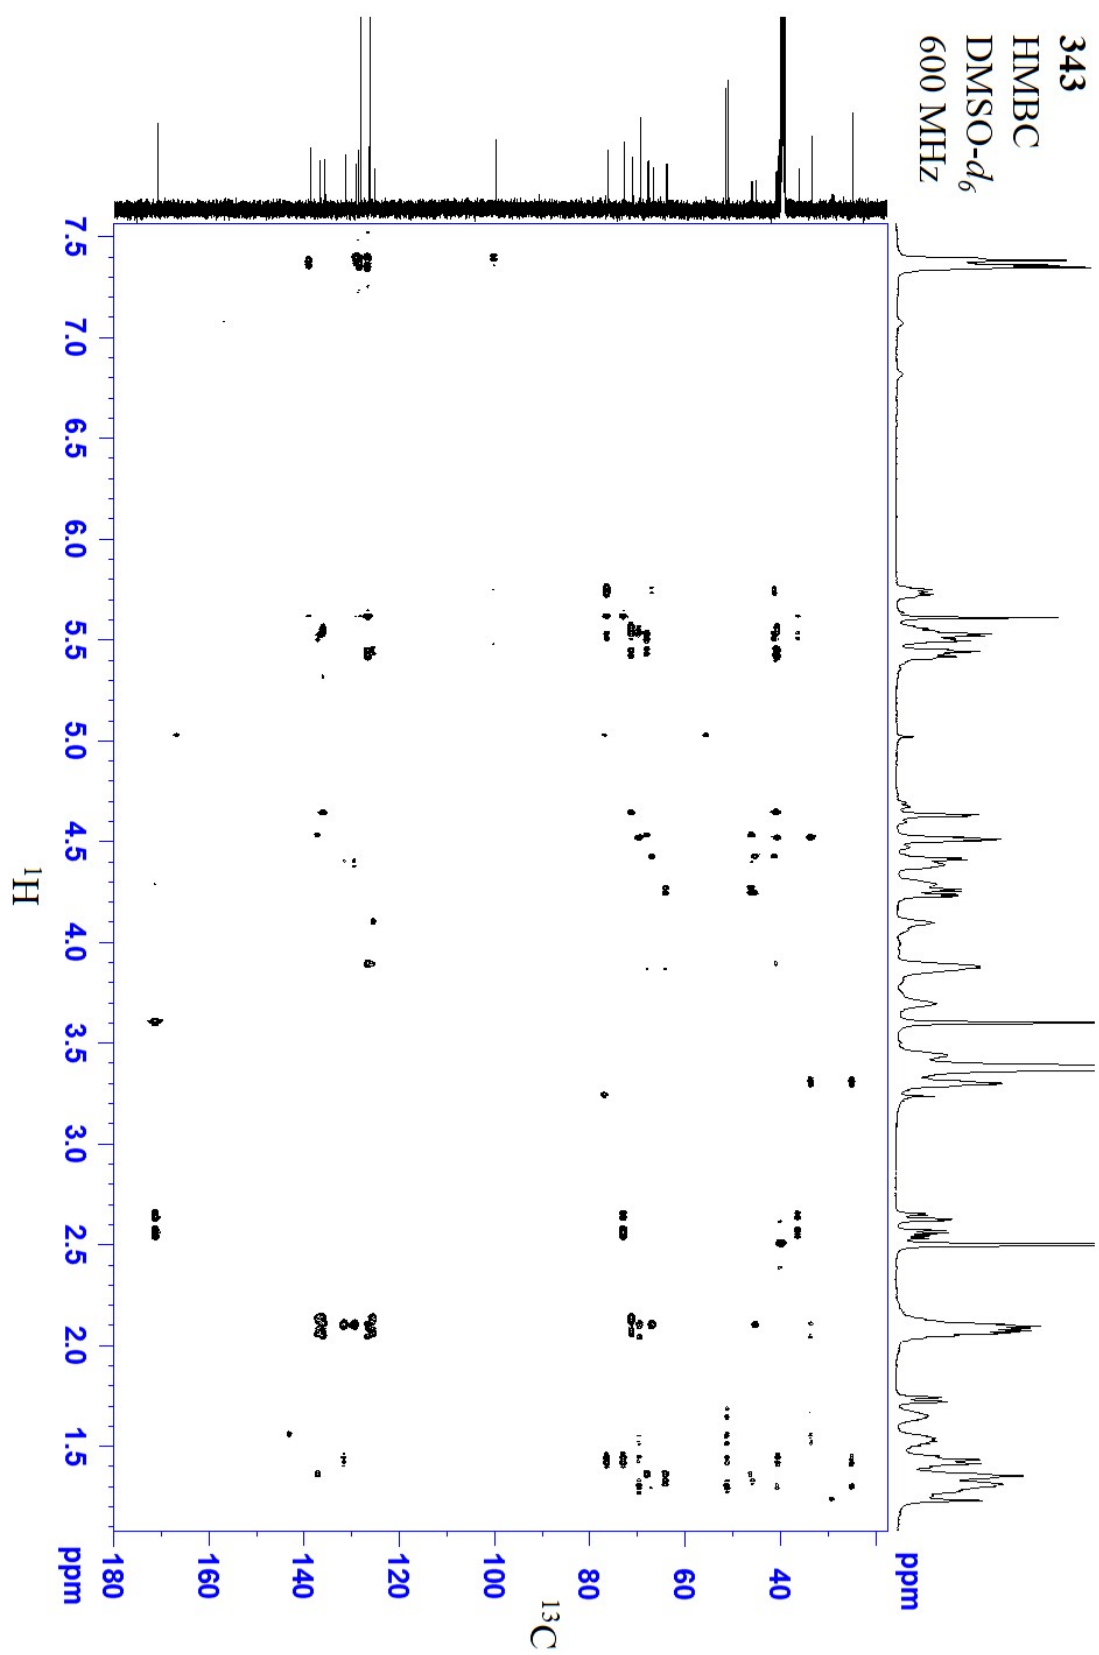

HMBC spectrum of 35

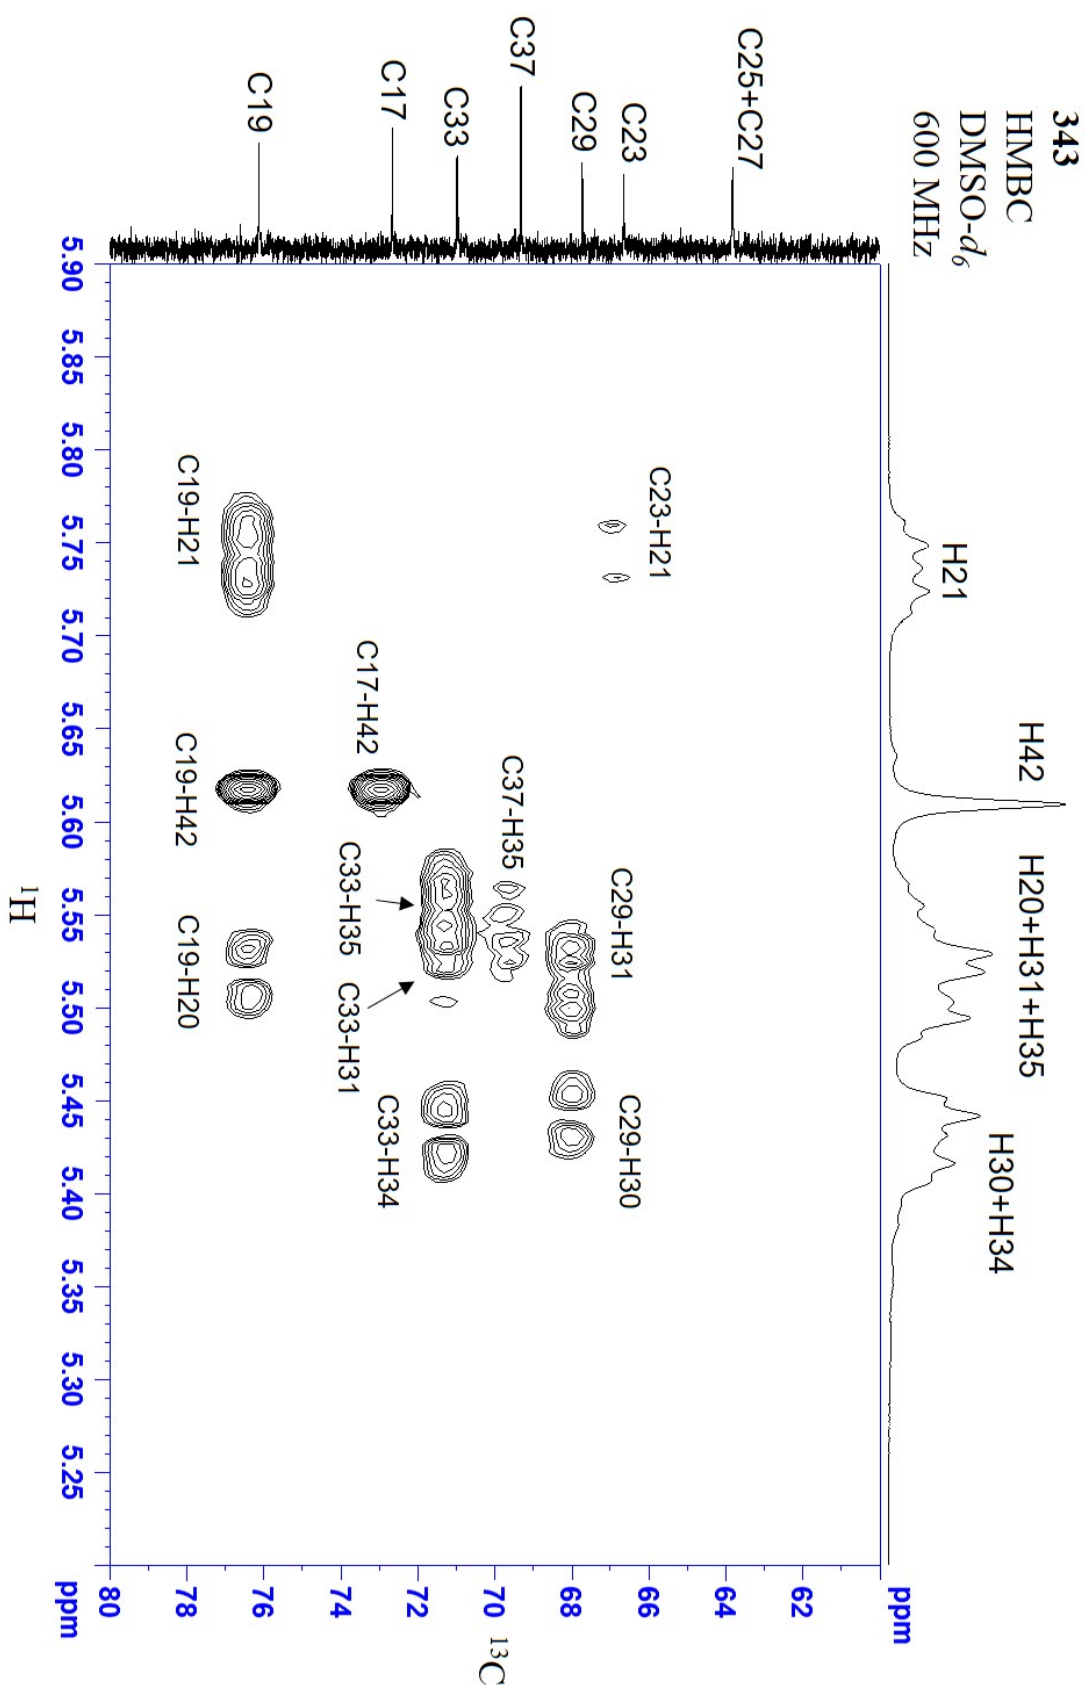HMBC spectrum of **35**

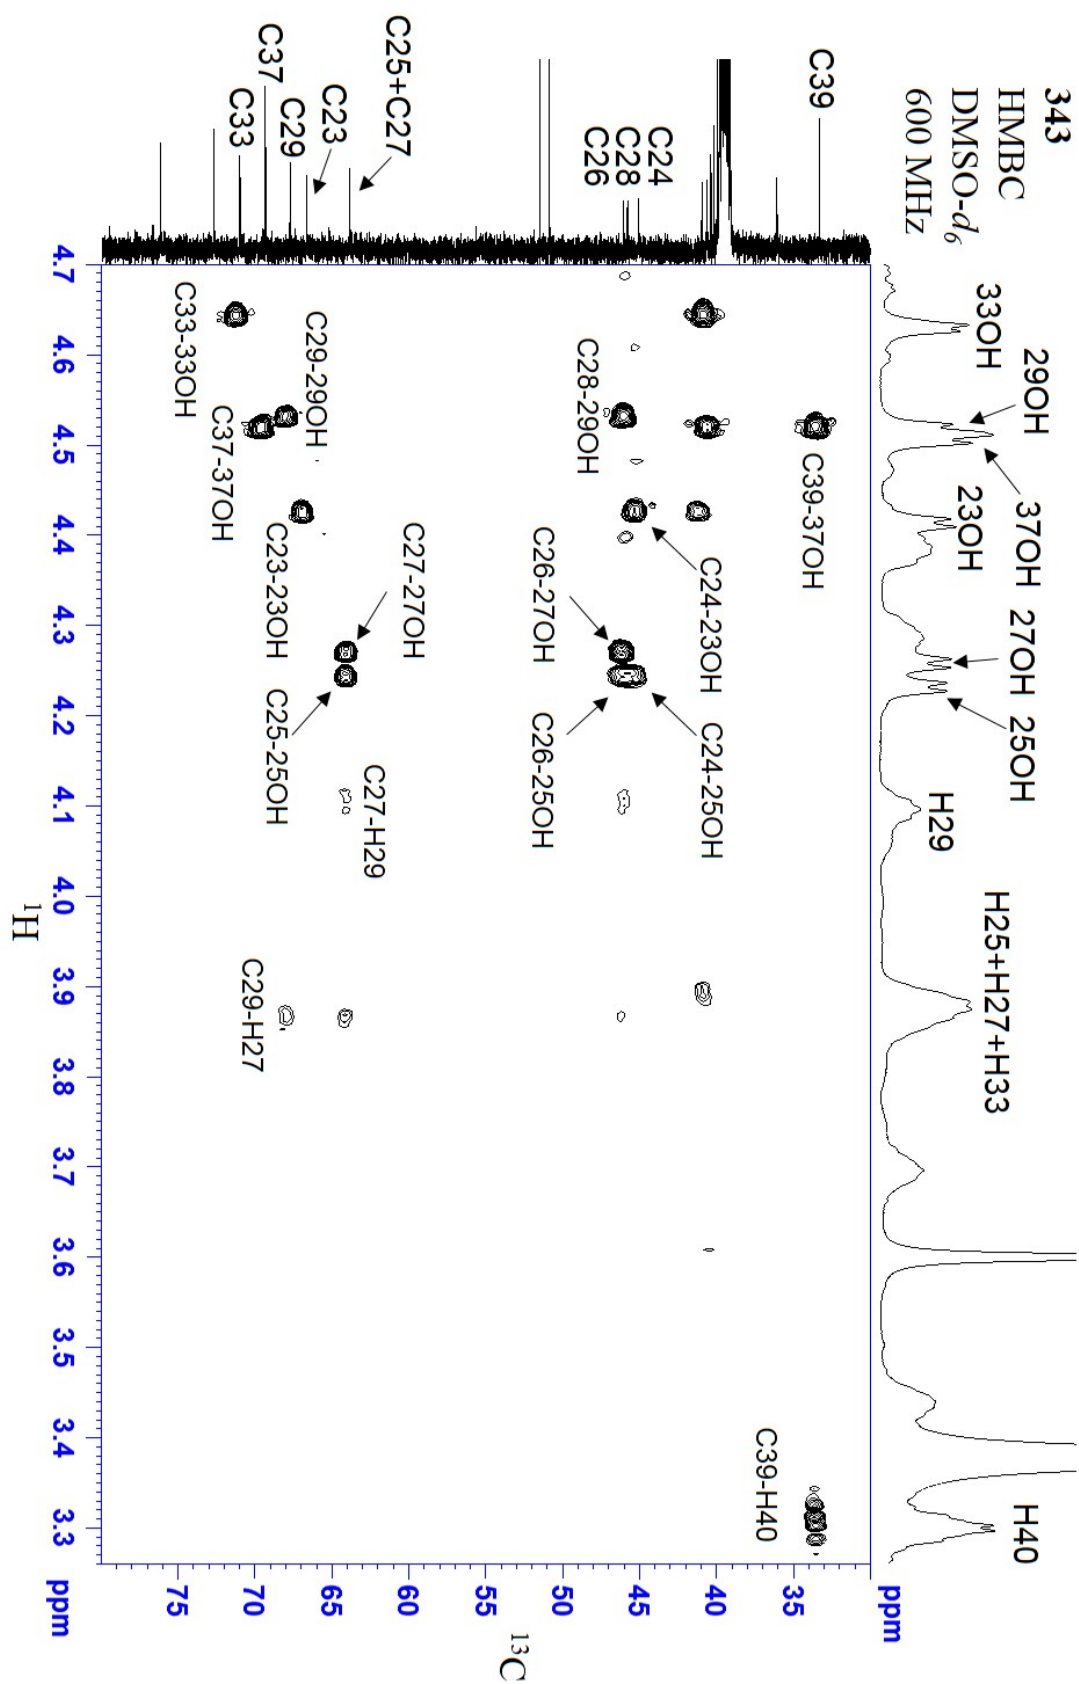

HMBC spectrum of **35**

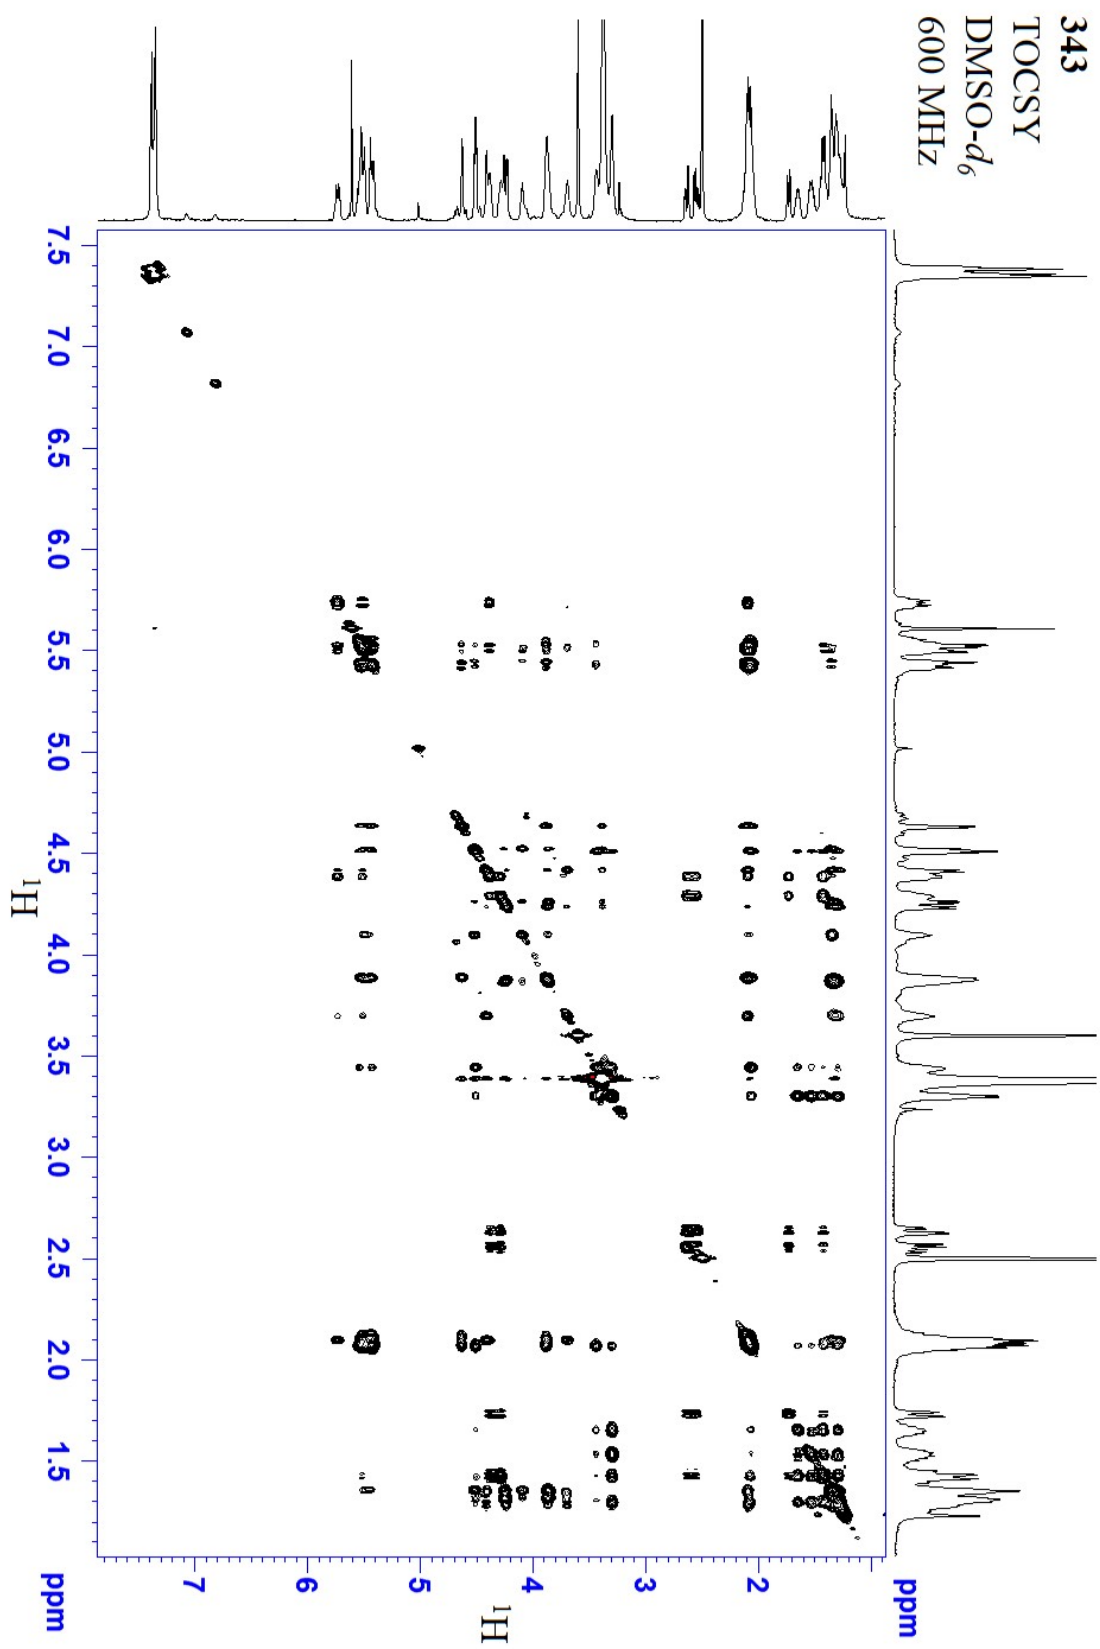

TOCSY spectrum of **35**



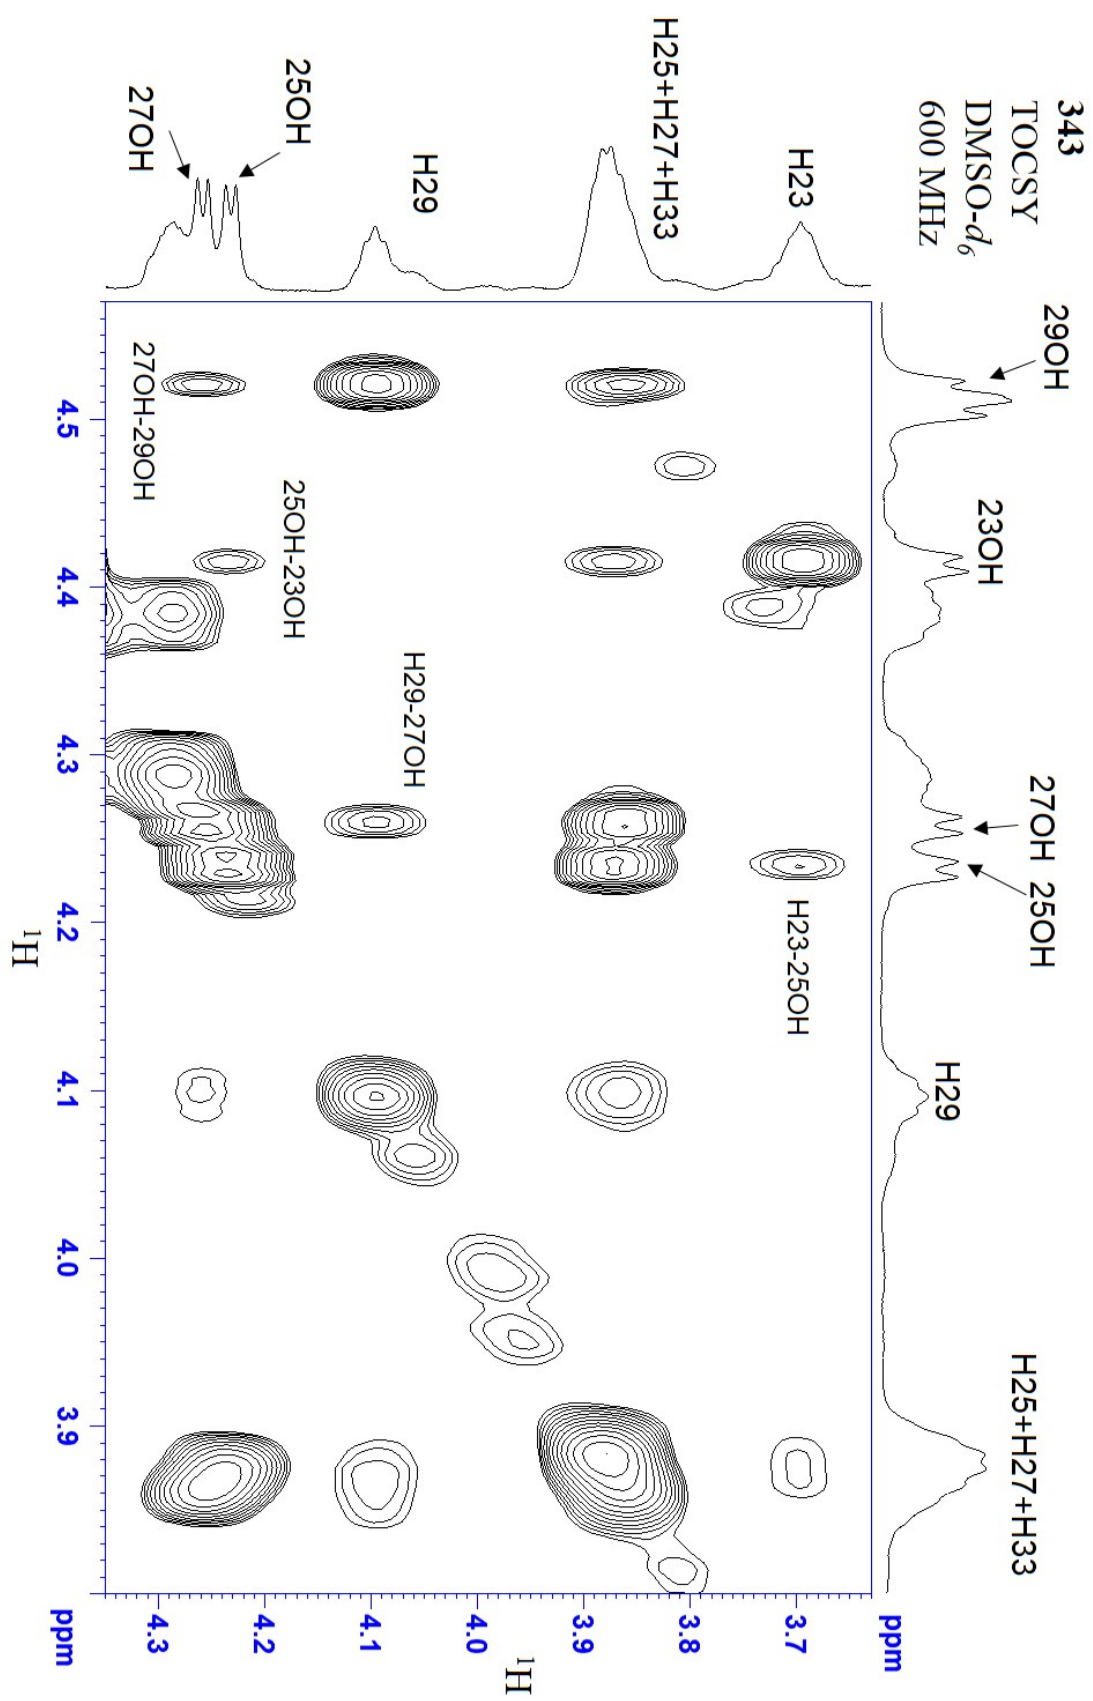

TOCSY spectrum of **35**

## Diastereomer Ratios and Configuration Assignments

### Compound 9: Diastereoselective Cyanation

<sup>1</sup>H NMR spectrum of purified minor diastereomer

<sup>1</sup>H NMR integration: Diastereomer ratios before separation

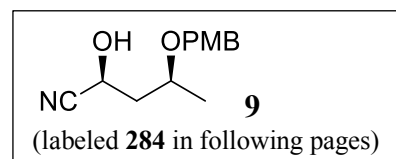

### Compound 26a: Model Mukaiyama Aldol with TBDPS

<sup>1</sup>H NMR integration: Ratios of all four products before separation

<sup>1</sup>H NMR integration: Diastereomer ratios after separation of kinetic and thermodynamic products

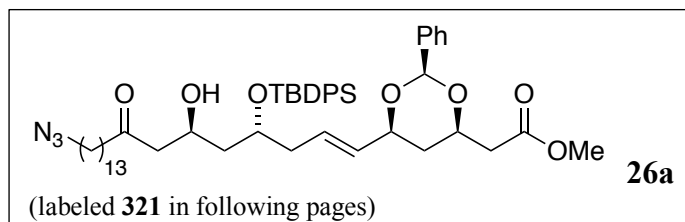

### Compound 41a and 41b: Acetonide Derivatives of 1,3,5-Triol 28

(labeled **327a** and **327b** in following pages)

DEPT spectrum showing *anti,anti* configuration (acetonide methyl groups at ca. 25 ppm)

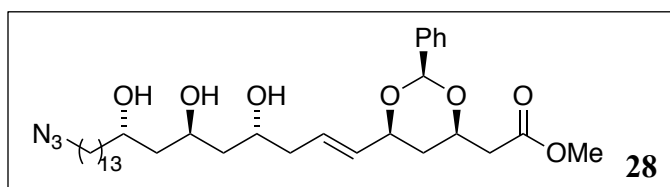

### Compound 26b: Model Mukaiyama Aldol with TBS

<sup>1</sup>H NMR integration: Ratios of all four products before separation

<sup>1</sup>H NMR integration: Diastereomer ratios after separation of kinetic and thermodynamic products

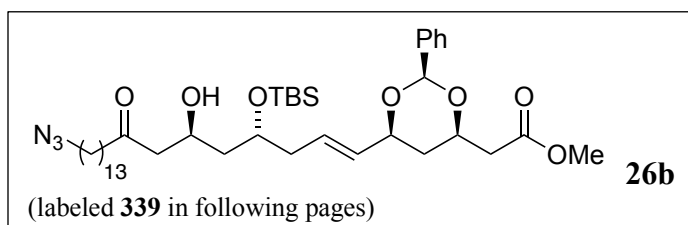

### Compound 33: Mukaiyama Aldol (fully functionalized)

<sup>1</sup>H NMR integration: Diastereomer ratio

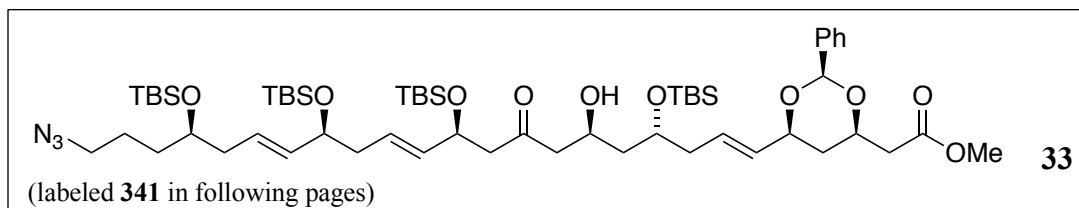

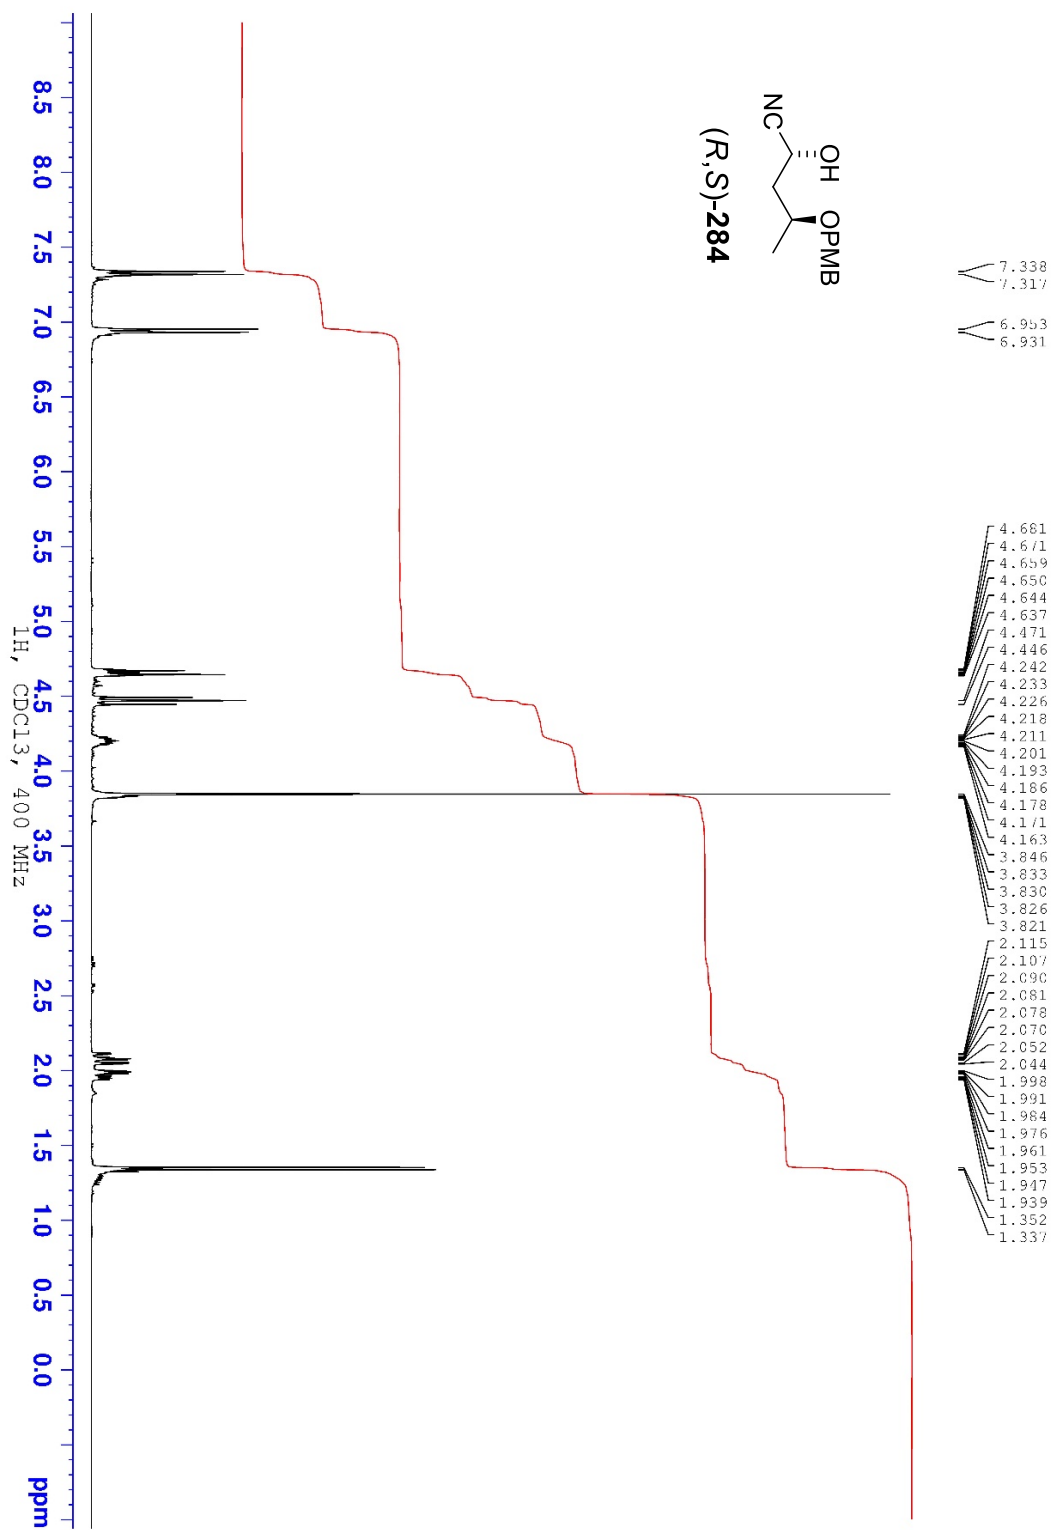

HNMR of the authentic minor diastereomer of **9**

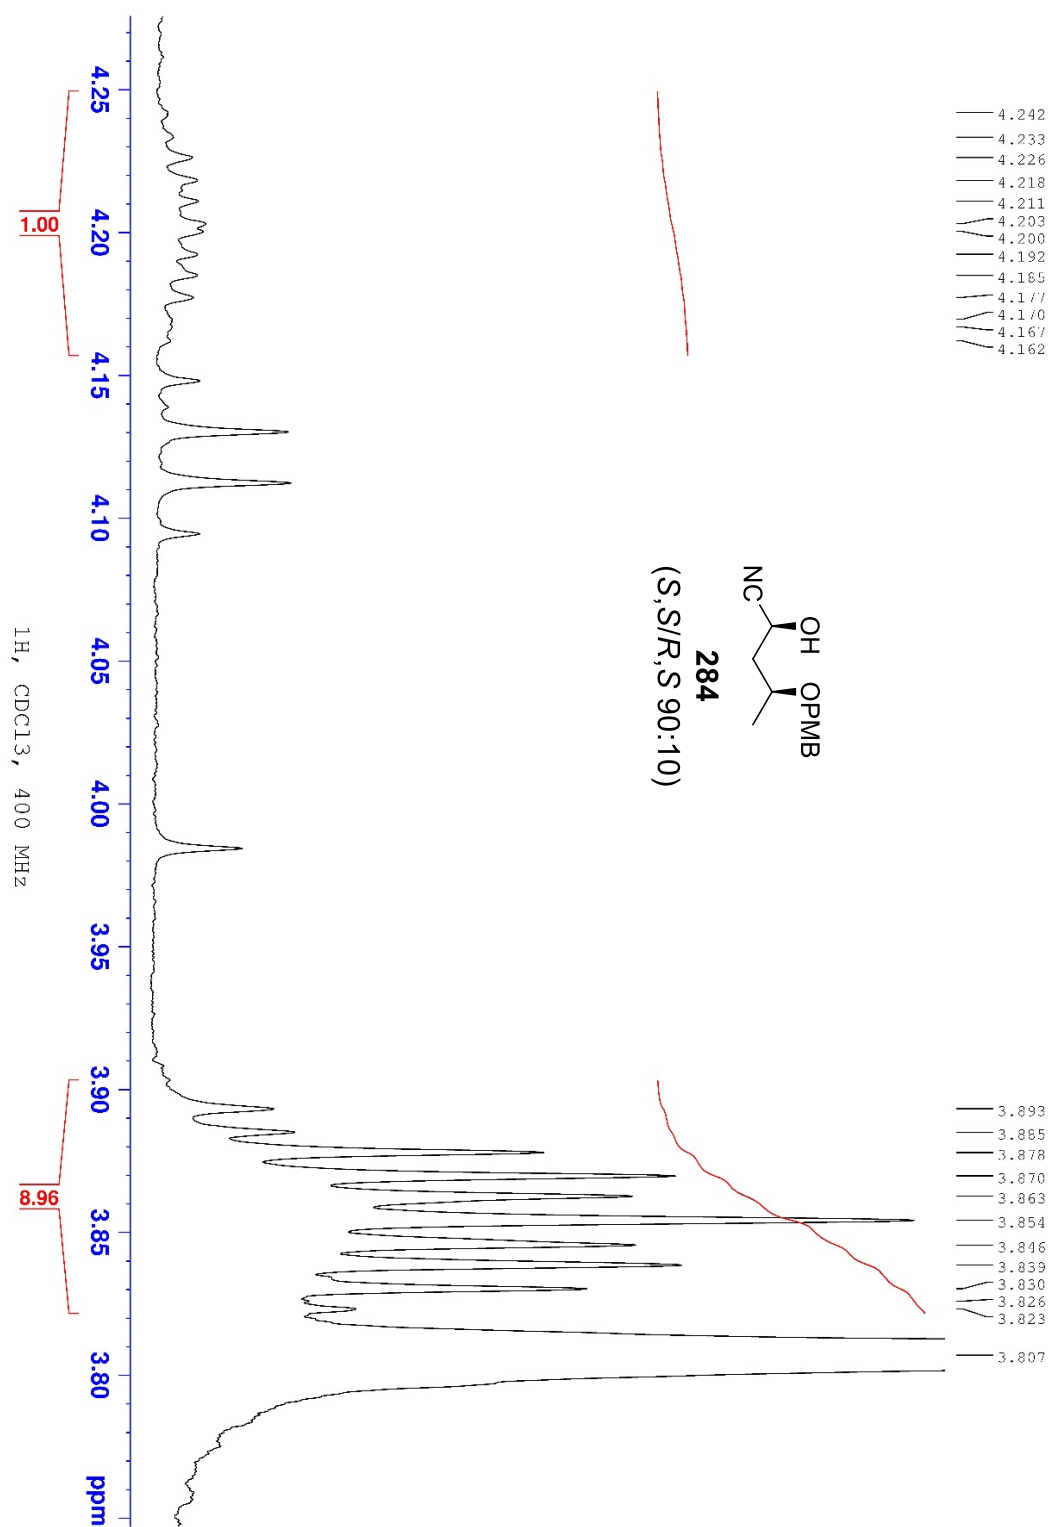

<sup>1</sup>H NMR of **9**, integration of 90:10 mixture

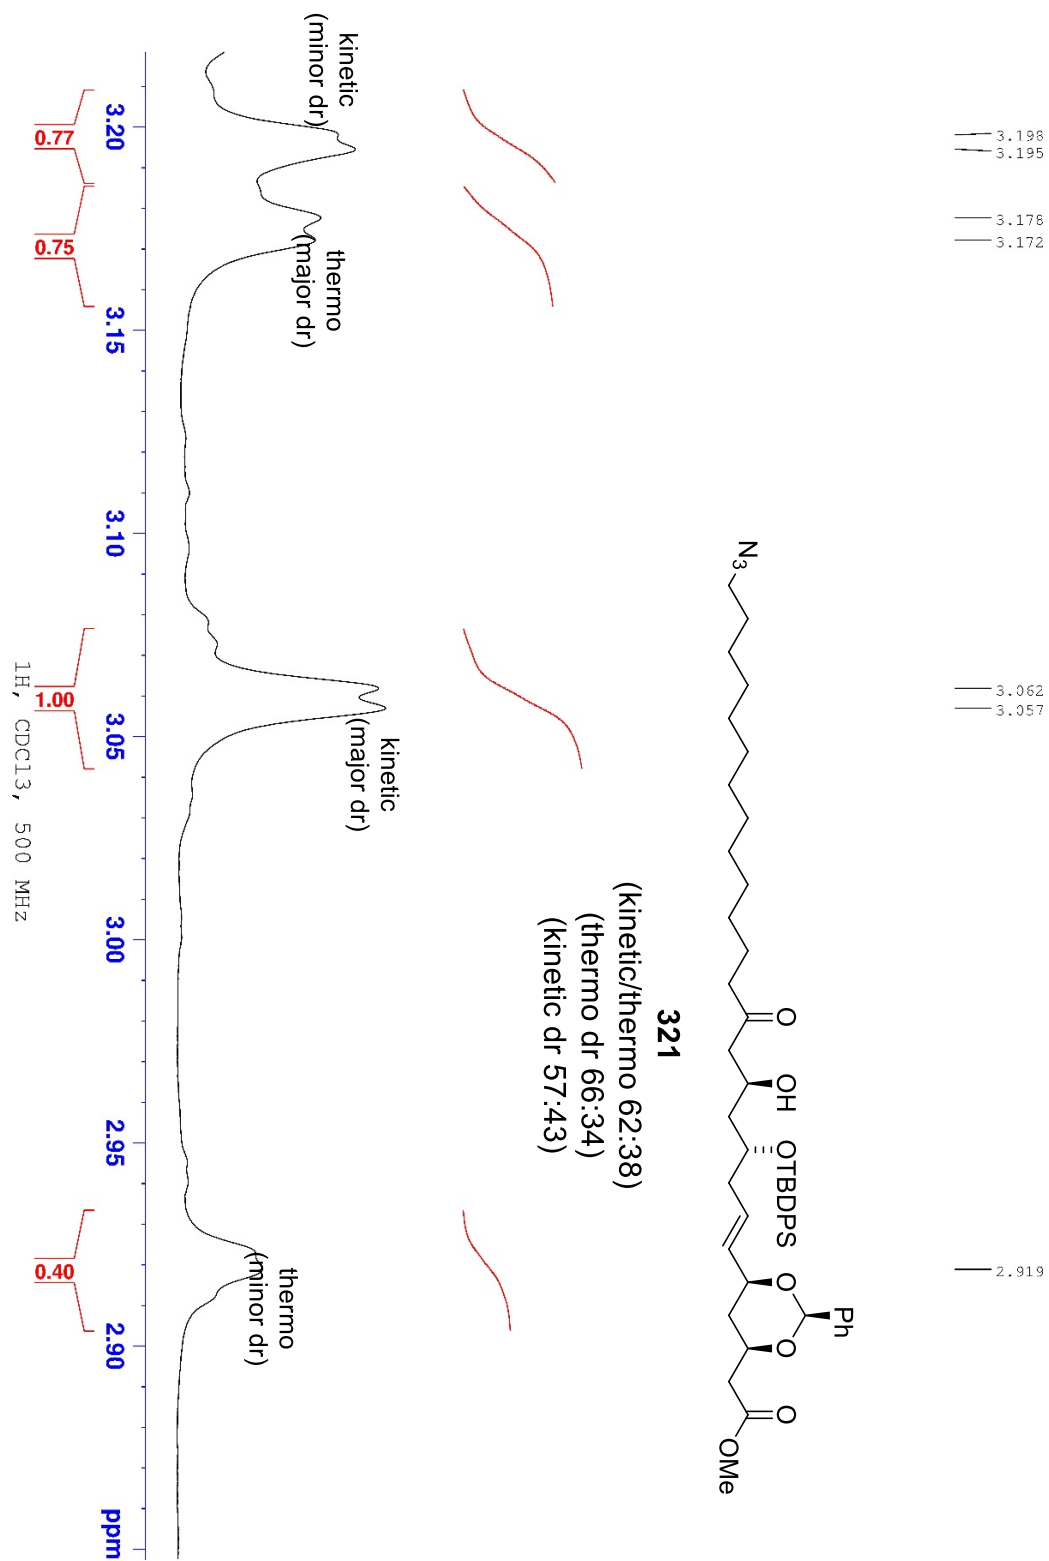

HNMR of **26a** product mixture

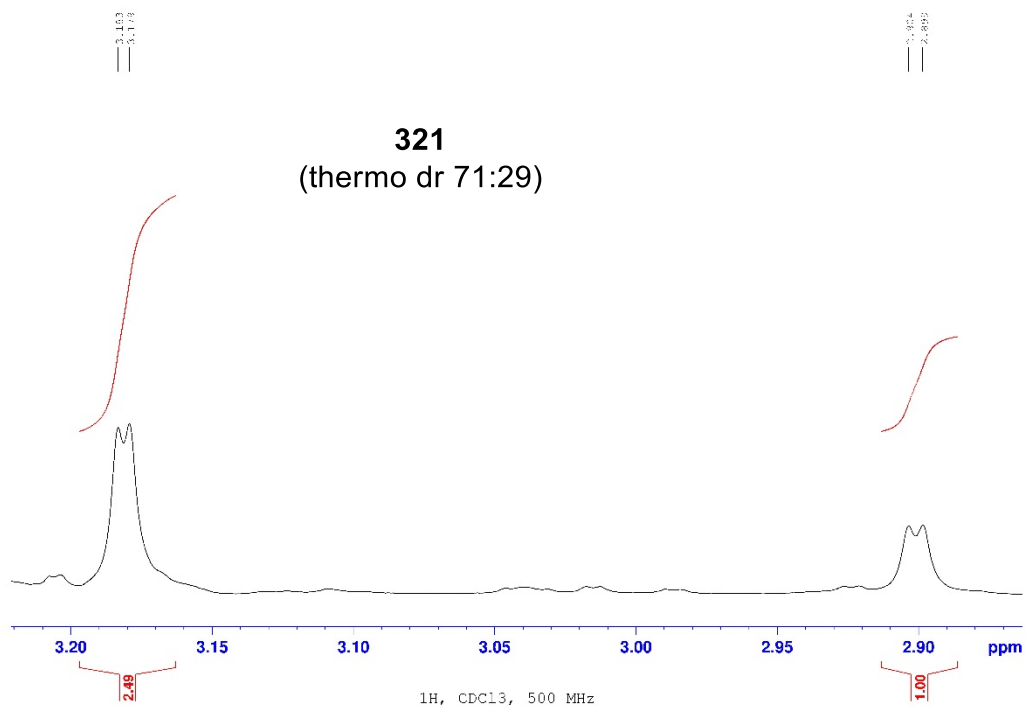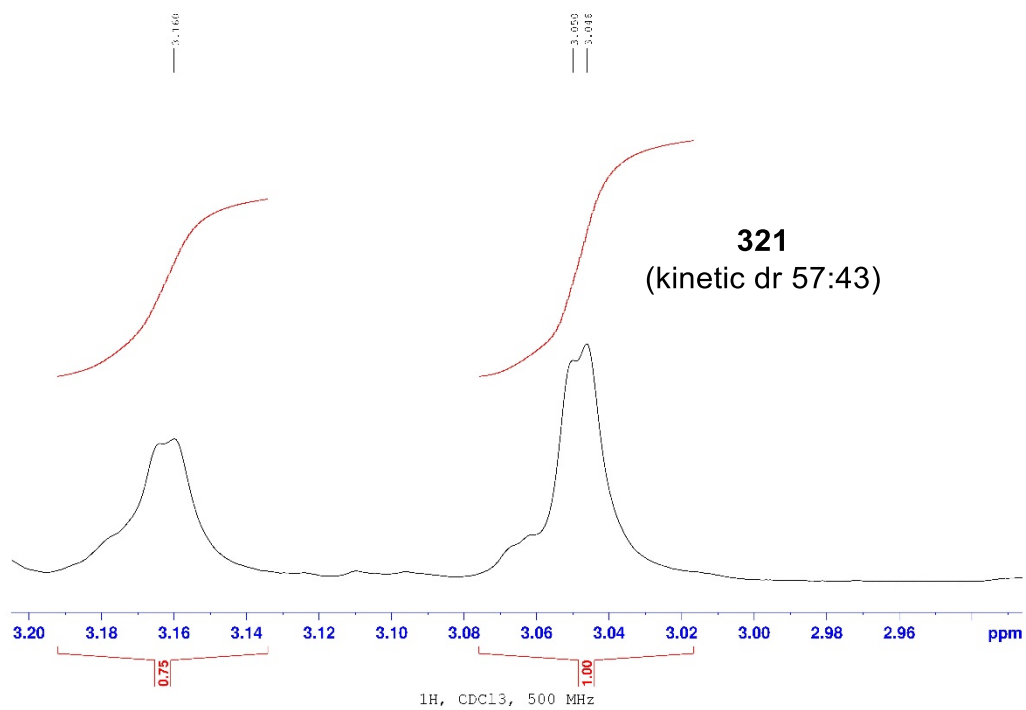

HNMR of **26a** after separation of kinetic and thermodynamic enolate products

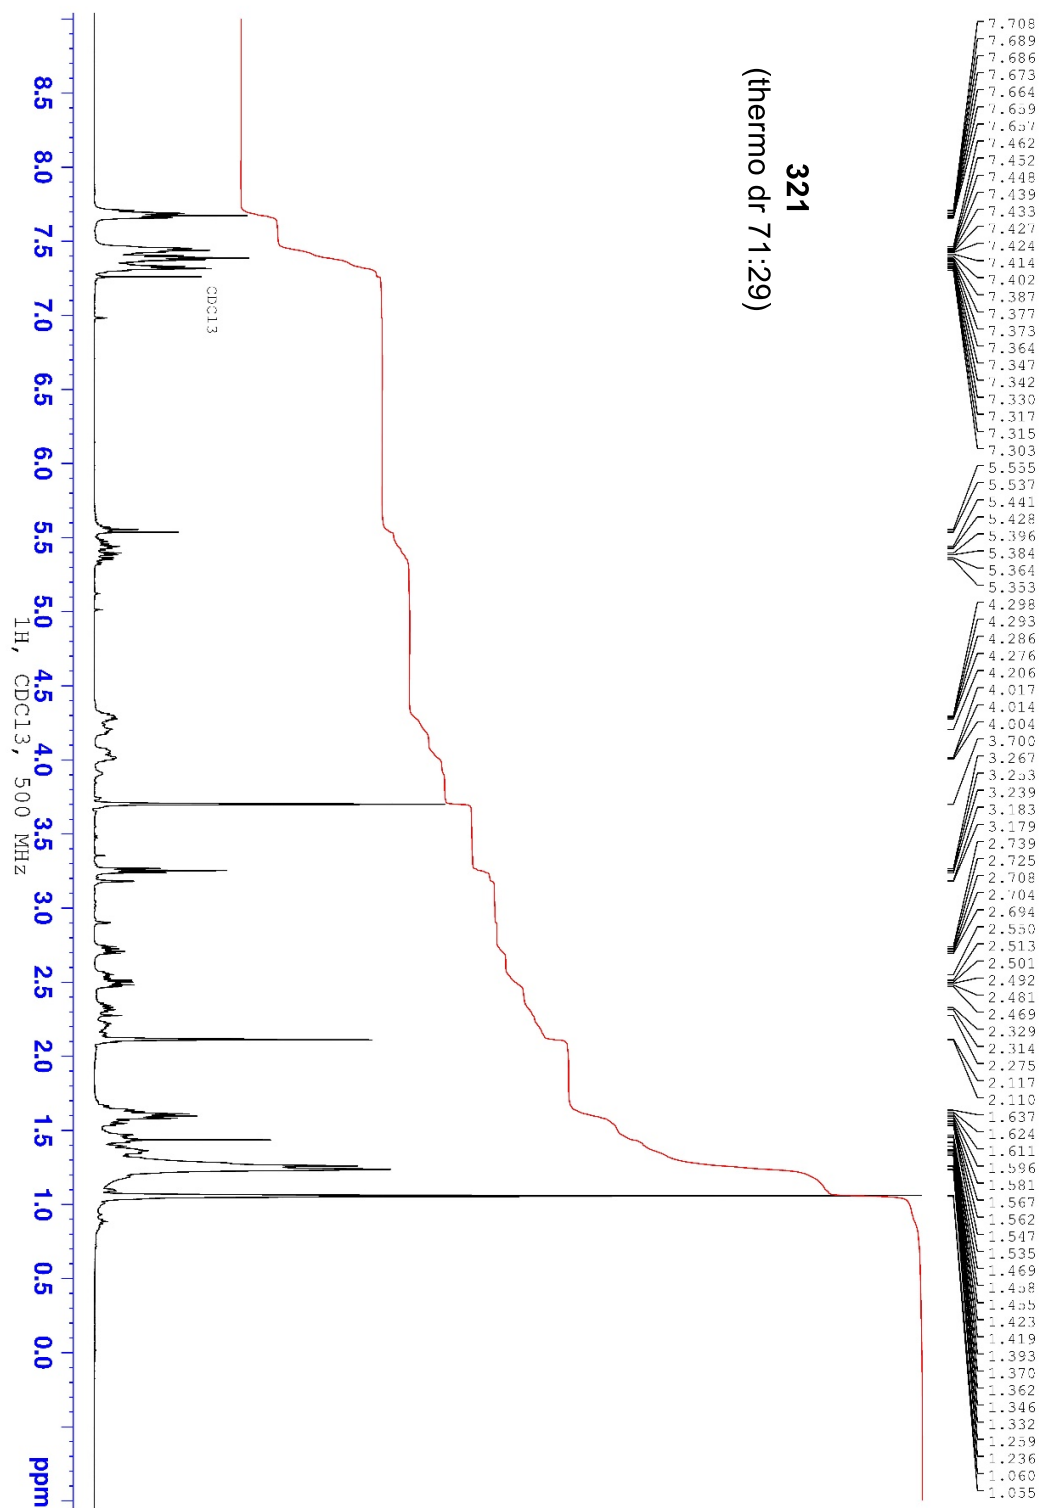

HNMR of **26a**, thermodynamic enolate product

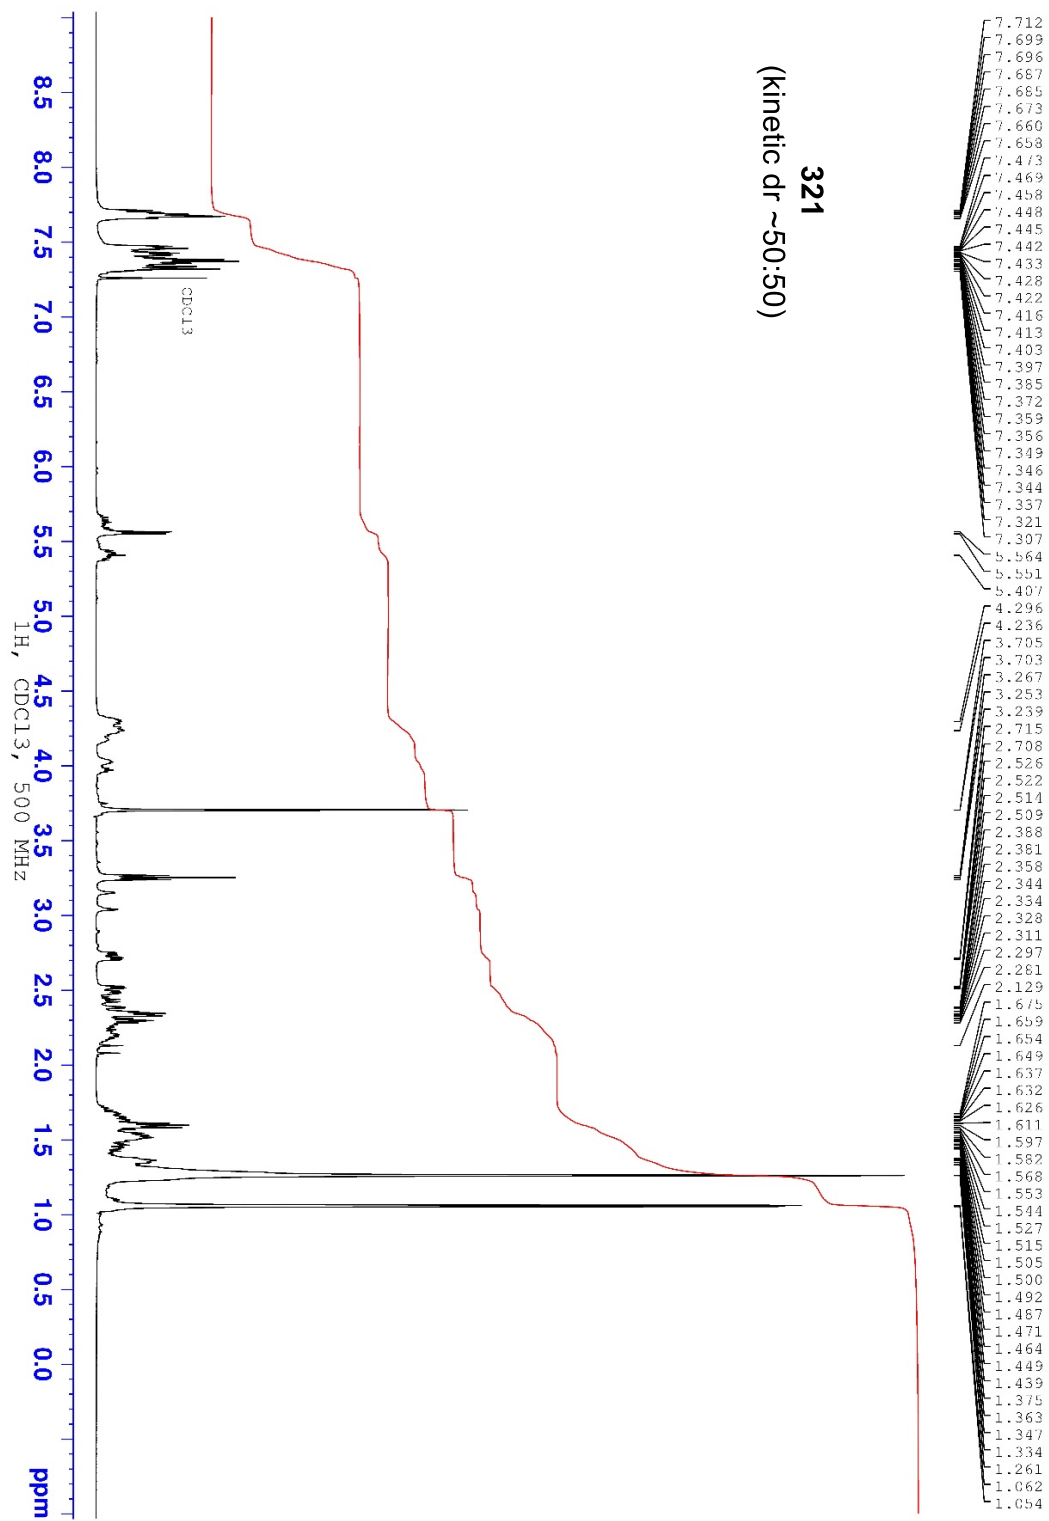

HNMR of **26a**, kinetic enolate product



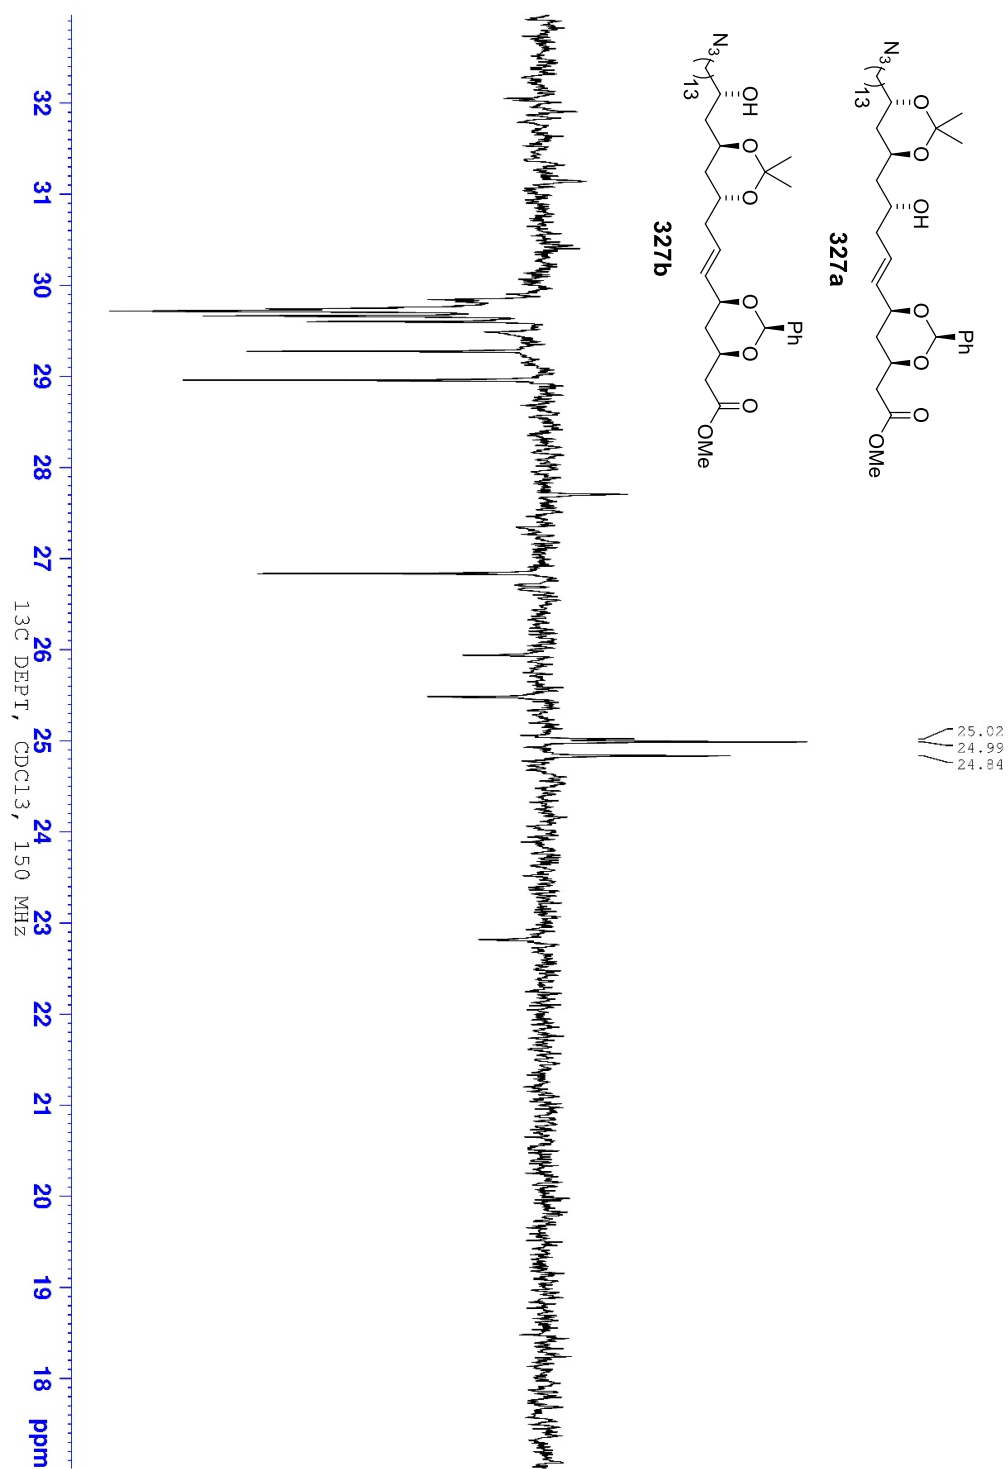

DEPT-135 spectrum of **41a** and **41b**

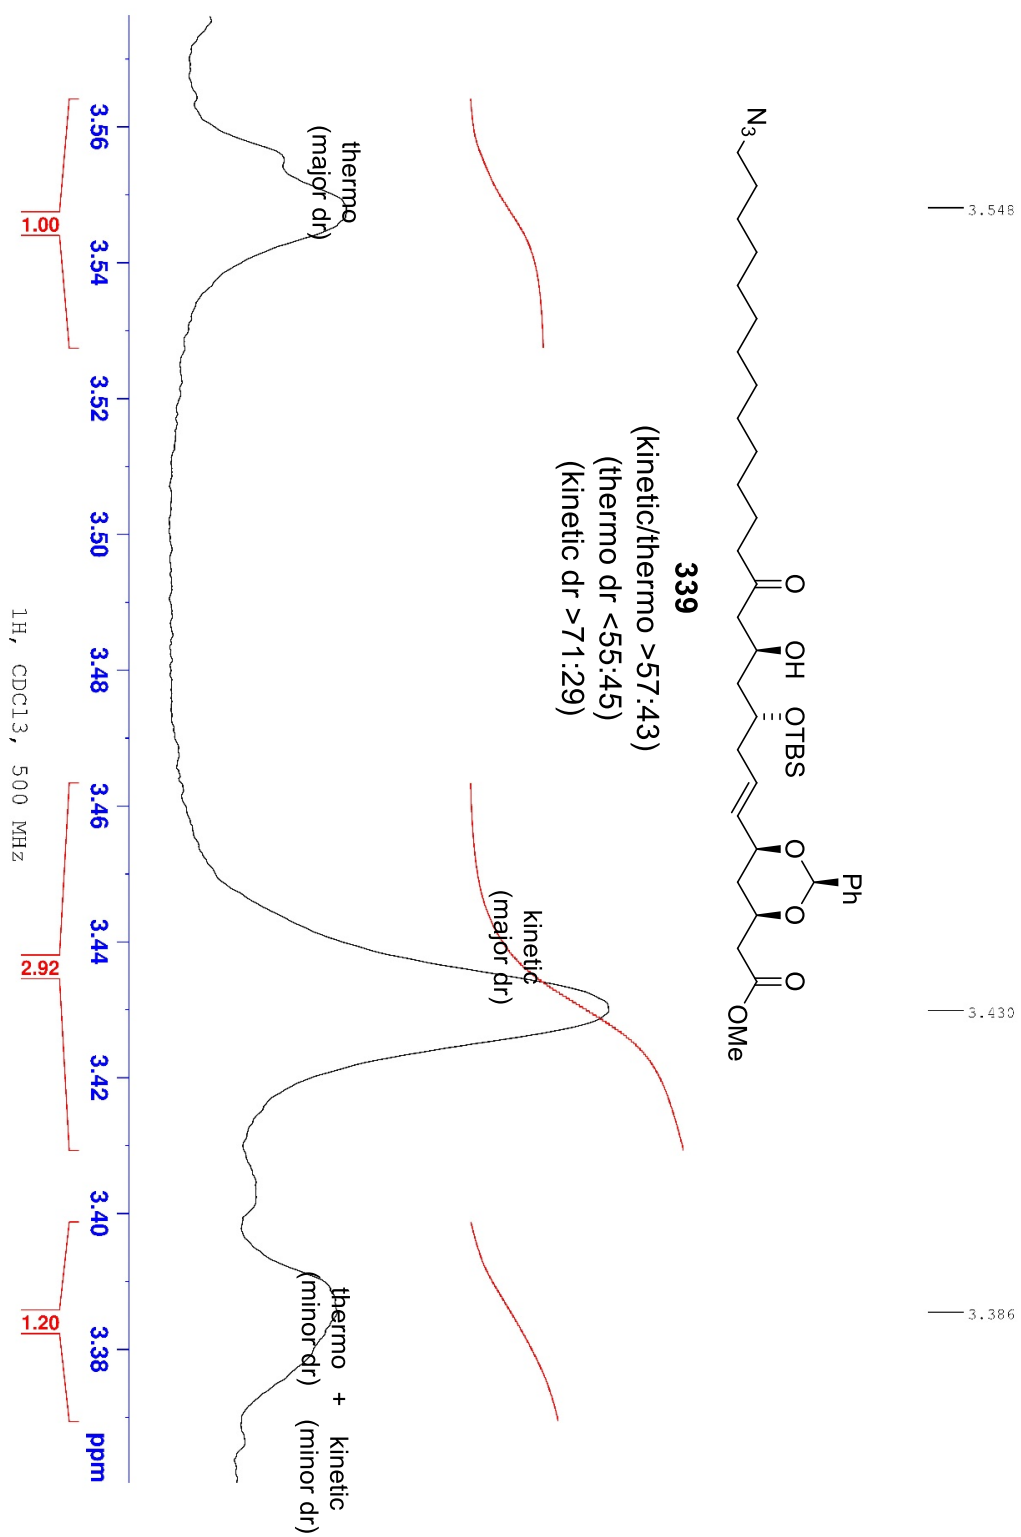

HNMR of **26b** product mixture

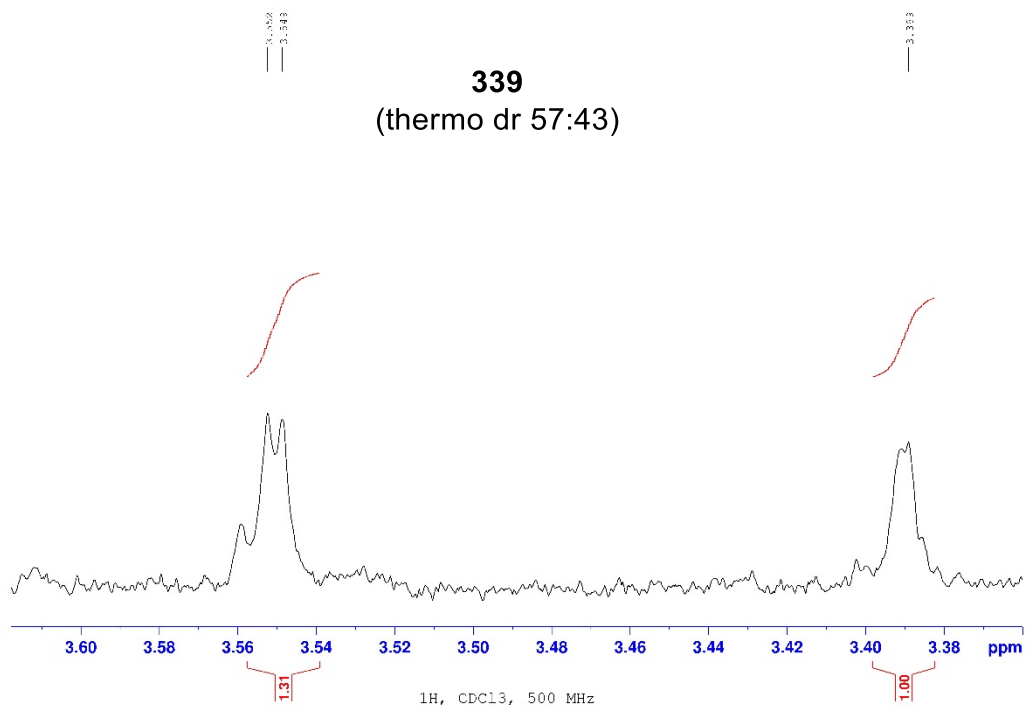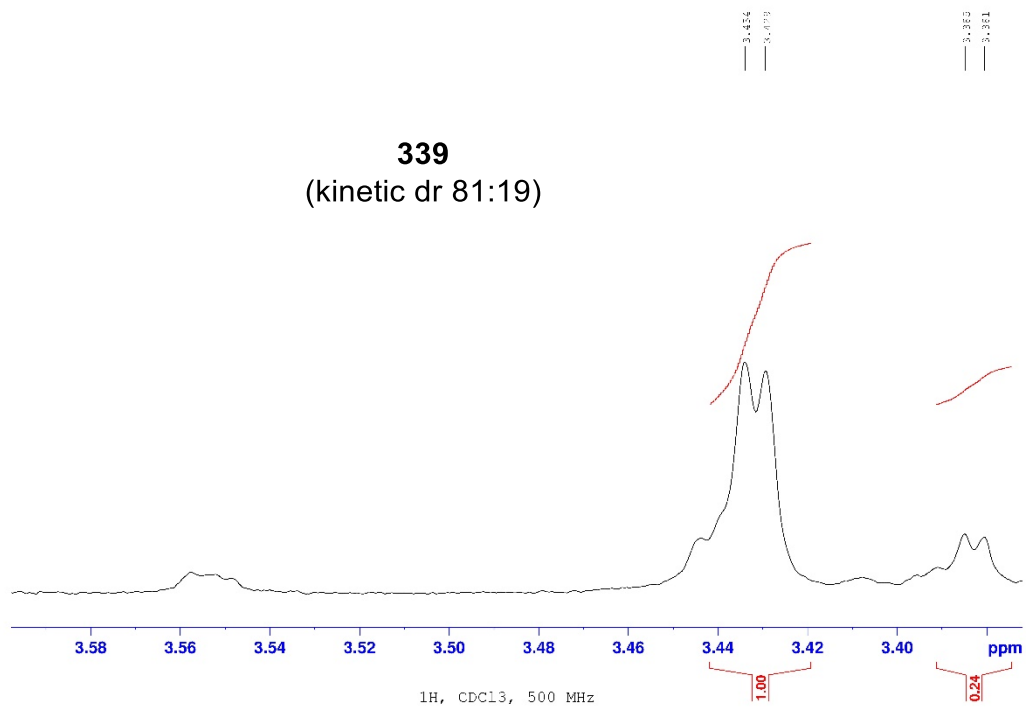

HNMR of **26b** after separation of kinetic and thermodynamic enolate products

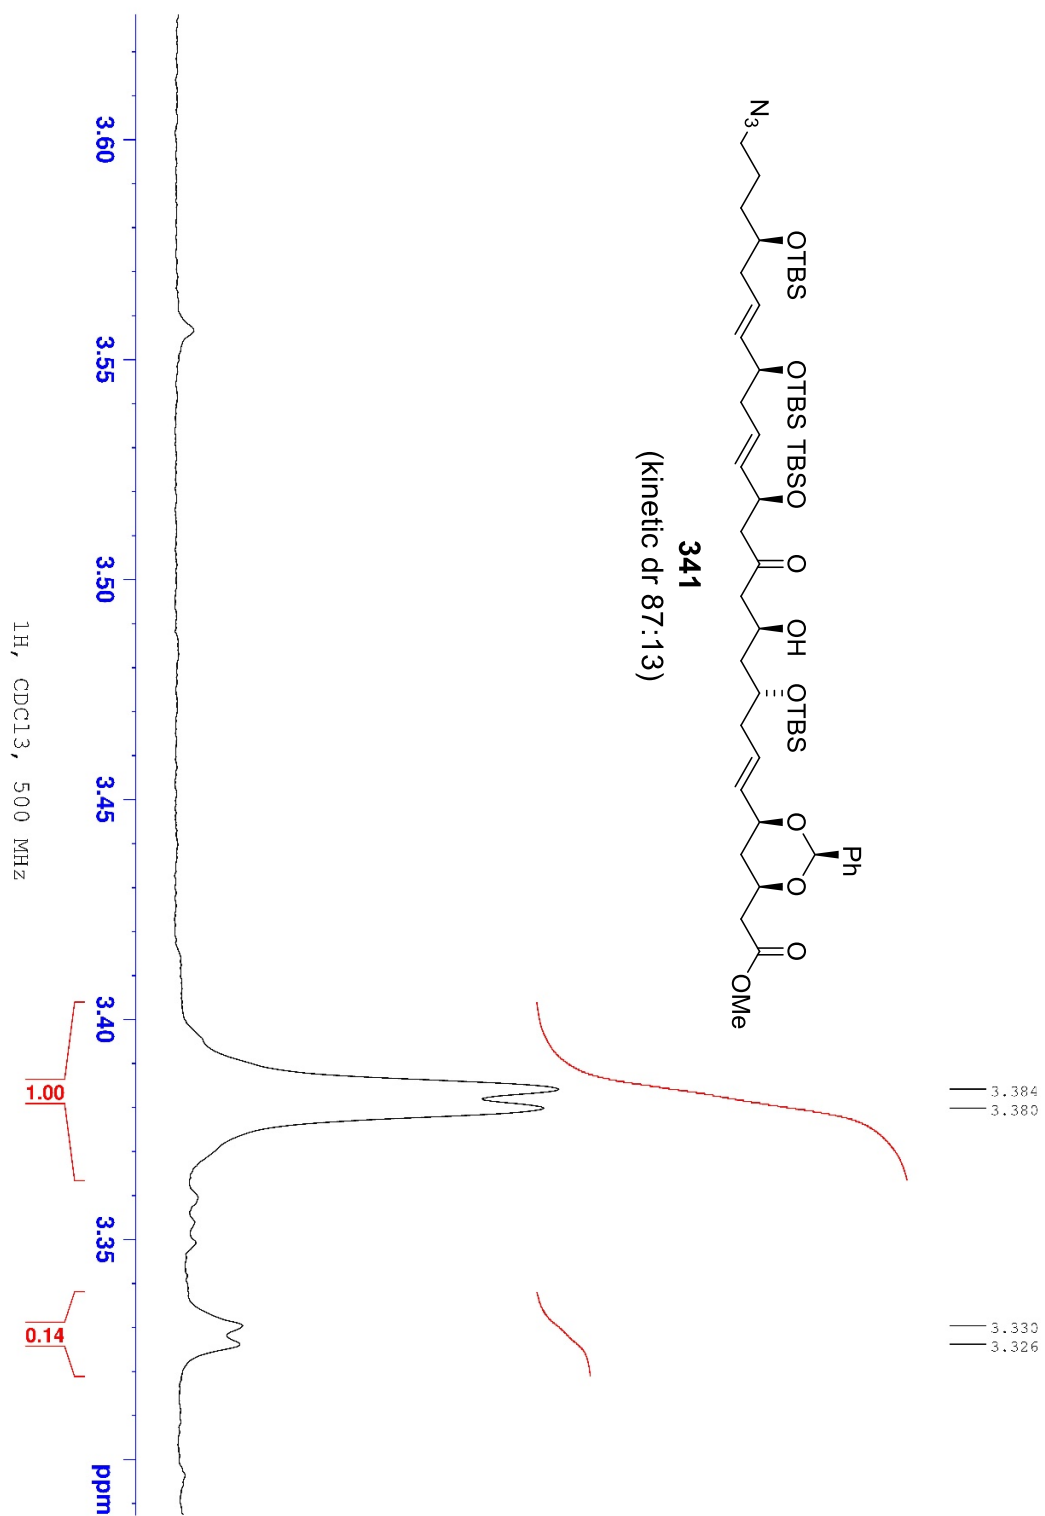

HNMR of **33** product mixture

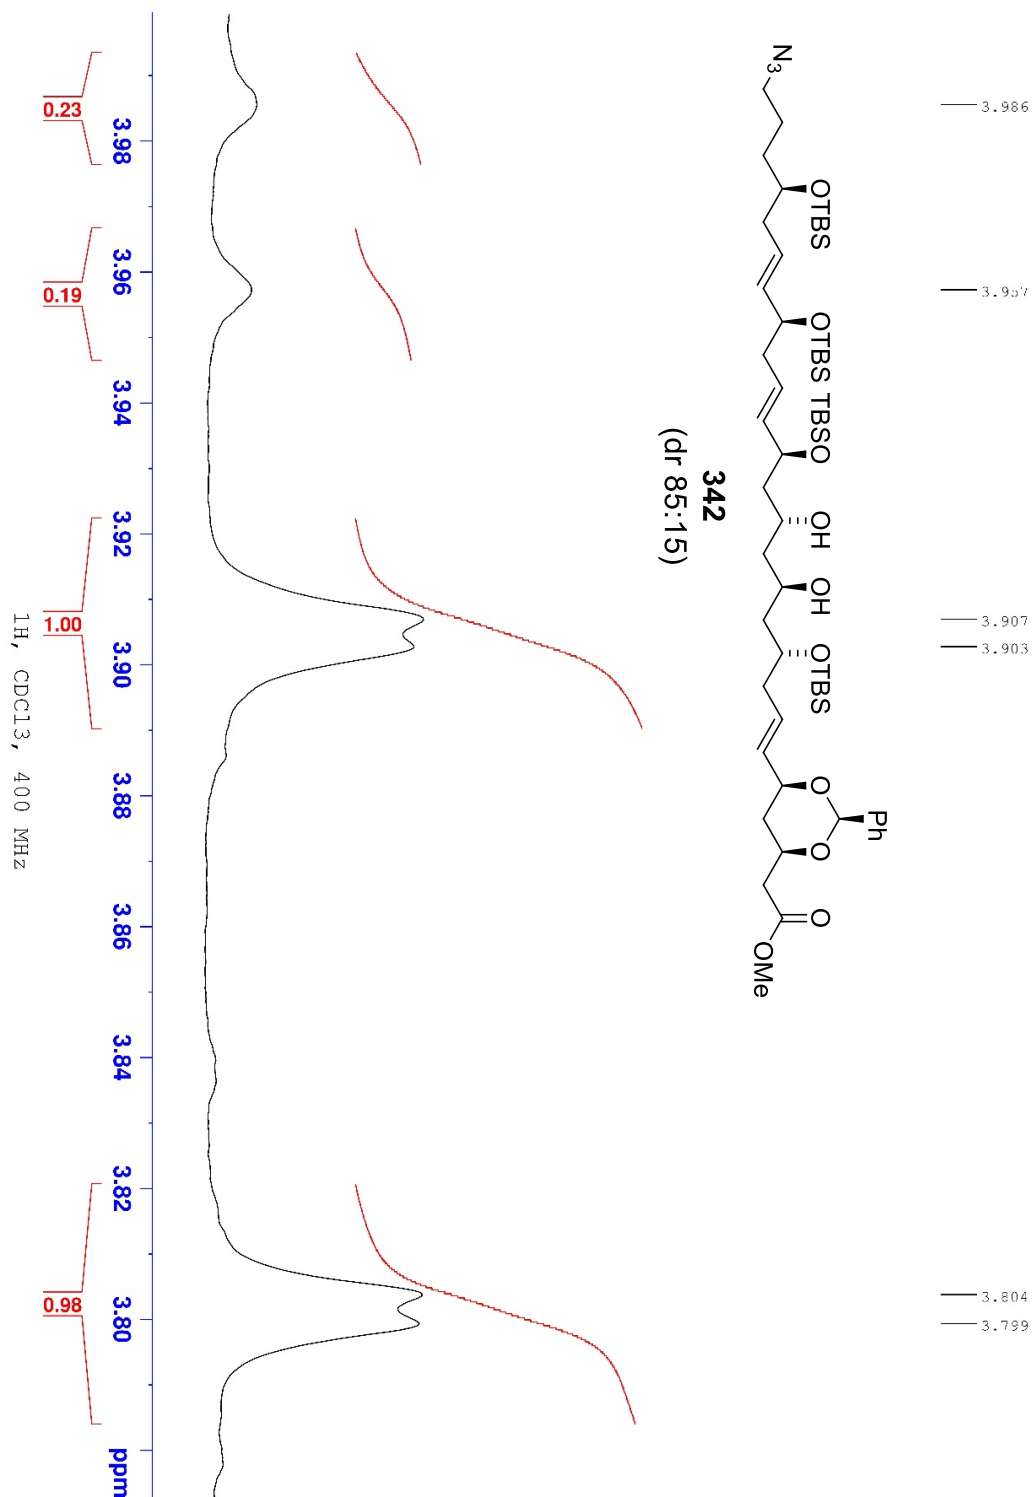

HNMR of **34** product mixture
